# 1 **Reovirus infection is regulated by NPC1 and endosomal** 2 **cholesterol homeostasis**

3  
4 Paula Ortega,<sup>a,b,c,d</sup> Gwen Taylor,<sup>c,d</sup> Rohit K. Jangra,<sup>e,†</sup> Raquel Tenorio,<sup>a</sup> Isabel  
5 Fernández de Castro,<sup>a</sup> Bernardo A. Mainou,<sup>f,††</sup> Robert C. Orchard,<sup>g</sup> Craig B. Wilen,<sup>h</sup>  
6 Pamela A. Bringleb,<sup>c,i</sup> Jorna Sojati,<sup>c,i</sup> Kartik Chandran,<sup>e</sup> Cristina Risco,<sup>a,\*</sup> and Terence S.  
7 Dermody,<sup>c,d,i,\*</sup>

8  
9 <sup>a</sup>Cell Structure Laboratory, National Center for Biotechnology, CNB-CSIC, campus  
10 UAM, Cantoblanco, 28049 Madrid, Spain

11  
12 <sup>b</sup>PhD Program in Molecular Biosciences, Autònoma de Madrid University, 28049  
13 Madrid, Spain

14  
15 <sup>c</sup>Department of Pediatrics, University of Pittsburgh School of Medicine, Pittsburgh,  
16 Pennsylvania, USA

17  
18 <sup>d</sup>Institute of Infection, Inflammation, and Immunity, UPMC Children's Hospital of  
19 Pittsburgh, Pittsburgh, Pennsylvania, USA

20  
21 <sup>e</sup>Department of Microbiology and Immunology, Albert Einstein College of Medicine,  
22 Bronx, New York, USA

23  
24 <sup>f</sup>Department of Pediatrics, Vanderbilt University School of Medicine, Nashville,  
25 Tennessee, USA

26

27 <sup>g</sup>Department of Immunology, University of Texas Southwestern Medical Center, Dallas,  
28 Texas, USA

29

30 <sup>h</sup>Departments of Laboratory Medicine and Immunobiology, Yale University School of  
31 Medicine, New Haven, Connecticut, USA

32

33 <sup>i</sup>Department of Microbiology and Molecular Genetics, University of Pittsburgh School of  
34 Medicine, Pittsburgh, Pennsylvania, USA

35

36 <sup>†</sup>Current address: Department of Microbiology and Immunology, Louisiana State  
37 University Shreveport, Shreveport, Louisiana, USA

38

39 <sup>††</sup>Current address: Centers for Disease Control and Prevention, Atlanta, Georgia, USA

40

41 \*Corresponding authors: [crisco@cnb.csic.es](mailto:crisco@cnb.csic.es) and [terence.dermody@chp.edu](mailto:terence.dermody@chp.edu)

42

43 **Running title:** Reovirus infection is regulated by NPC1 and endosomal cholesterol

44 homeostasis

45

46 **ABSTRACT** Cholesterol homeostasis is required for the replication of many viruses,  
47 including Ebola virus, hepatitis C virus, and human immunodeficiency virus-1. Niemann-  
48 Pick C1 (NPC1) is an endosomal-lysosomal membrane protein involved in cholesterol  
49 trafficking from late endosomes and lysosomes to the endoplasmic reticulum. We  
50 identified NPC1 in CRISPR and RNA interference screens as a putative host factor for  
51 infection by mammalian orthoreovirus (reovirus). Following internalization via clathrin-  
52 mediated endocytosis, the reovirus outer capsid is proteolytically removed, the  
53 endosomal membrane is disrupted, and the viral core is released into the cytoplasm  
54 where viral transcription, genome replication, and assembly take place. We found that  
55 reovirus infection is significantly impaired in cells lacking NPC1, but infection is restored  
56 by treatment of cells with hydroxypropyl- $\beta$ -cyclodextrin, which binds and solubilizes  
57 cholesterol. Absence of NPC1 did not dampen infection by infectious subvirion  
58 particles, which are reovirus disassembly intermediates that bypass the endocytic  
59 pathway for infection of target cells. NPC1 is not required for reovirus attachment to the  
60 plasma membrane, internalization into cells, or uncoating within endosomes. Instead,  
61 NPC1 is required for delivery of transcriptionally active reovirus core particles into the  
62 cytoplasm. These findings suggest that cholesterol homeostasis, ensured by NPC1  
63 transport activity, is required for reovirus penetration into the cytoplasm, pointing to a  
64 new function for NPC1 and cholesterol homeostasis in viral infection.

65 **IMPORTANCE** Genetic screens are useful strategies to identify host factors required  
66 for viral infection. NPC1 was identified in independent CRISPR and RNA interference  
67 screens as a putative host factor required for reovirus replication. We discovered that  
68 NPC1-mediated cholesterol transport is dispensable for reovirus attachment,  
69 internalization, or disassembly but required for penetration of the viral disassembly  
70 intermediate from late endosomes into the cytoplasm. These findings pinpoint an  
71 essential function for cholesterol in the entry of reovirus and raise the possibility that  
72 cholesterol homeostasis regulates the entry of other viruses that penetrate late  
73 endosomes to initiate replication.

74

## 75 INTRODUCTION

76 Viral replication is dependent on cellular proteins and pathways for entry, transport, and  
77 release of the viral genome to sites of replication in the cell. Viral attachment to host  
78 cells occurs by interactions with cell-surface proteins, lipids, and carbohydrate moieties  
79 at the plasma membrane and often triggers virus uptake by receptor-mediated  
80 endocytosis (1-7). Viruses that traverse through endosomes must escape the  
81 endosomal compartment and release their genomes at sites of replication to initiate  
82 productive infection. Enveloped viruses generally accomplish endosomal escape using  
83 mechanisms involving receptor- or pH-mediated fusion of the viral envelope and  
84 endosomal membrane (6, 8-10). In contrast, nonenveloped viruses penetrate  
85 endosomal membranes by establishing small membrane pores or large membrane  
86 disruptions (9, 11-13). While both enveloped and nonenveloped viruses depend on  
87 conformational changes of viral structural proteins to escape endosomes, mechanisms  
88 underlying nonenveloped virus membrane penetration are not well understood (6).

89 Mammalian orthoreoviruses (reoviruses) are nonenveloped icosahedral viruses  
90 that infect a broad range of mammalian hosts. Reovirus infections are usually  
91 asymptomatic in humans, but these viruses have been implicated in development of  
92 celiac disease (14). Reovirus virions include two protein shells, the outer capsid,  
93 composed primarily of  $\mu 1$ - $\sigma 3$  heterohexamers, and core (15-17). Within the core, 10  
94 segments of double-stranded (ds) RNA are packaged, distributed by size into three  
95 large (L), three medium (M), and four small (S) segments (17). Following receptor-  
96 mediated endocytosis, the reovirus outer capsid undergoes a series of conformational  
97 changes and disassembly events required for release of transcriptionally active cores  
98 into the cytoplasm (18, 19).

99            Within late endosomes, acid-dependent cathepsin proteases catalyze proteolysis  
100 of the viral outer-capsid protein  $\sigma 3$  and cleavage of the membrane-penetration protein  
101  $\mu 1$  to  $\delta$  and  $\phi$ , resulting in formation of metastable intermediates termed infectious  
102 subvirion particles (ISVPs) (20-24). Endosomal lipid composition induces ISVPs to  
103 undergo additional conformational changes resulting in exposure of hydrophobic  
104 domains of  $\delta$ , release of pore-forming fragment  $\mu 1N$ , and formation of ISVP\*s (25, 26).  
105 Release of  $\mu 1N$  during ISVP-to-ISVP\* conversion leads to endosomal penetration and  
106 release of the viral core into the cytoplasm where infection progresses (27-31).  
107 Although some essential viral and host factors required for reovirus penetration of the  
108 endosome are known, the process is still not well understood.

109            In this study, we used RNA interference and CRISPR screens to discover that  
110 Niemann Pick C1 (NPC1), an endolysosomal transmembrane protein that mediates  
111 cholesterol egress from late endosomes for redistribution to cellular membranes (32-  
112 34), is required for reovirus infection. We found that genetic ablation of NPC1 in human  
113 brain microvascular endothelial cells (HBMECs) diminishes reovirus infection by virions  
114 but not by ISVPs, suggesting that NPC1 is required for steps that differ between virions  
115 and ISVPs. Treatment of NPC1-null HBMECs with hydroxypropyl-beta-cyclodextrin  
116 (H $\beta$ CD), a macrocycle that binds and solubilizes cholesterol, restored infectivity by  
117 reovirus virions, suggesting that endosomal cholesterol homeostasis contributes to  
118 efficient reovirus entry. While NPC1 is not required for viral attachment to the plasma  
119 membrane, internalization, or uncoating within endosomes, we found that NPC1 is  
120 required for efficient release of reovirus cores from endosomes into the cytoplasm.  
121 Together, these findings suggest that cholesterol homeostasis, ensured by NPC1  
122 cholesterol transport activity, is essential for reovirus cell entry and penetration into the  
123 cytoplasm.

124 **RESULTS**

125 **CRISPR/Cas-9 and siRNA screens for host factors required for reovirus**

126 **infection identify NPC1.** To discover host factors required for reovirus infection, we  
127 conducted genome-wide CRISPR/Cas-9 and siRNA-based cell-survival screens. The  
128 CRISPR/Cas-9 screen was conducted using BV2 mouse microglial cells with the  
129 murine Asiago sgRNA library targeting over 20,000 genes. BV2 CRISPR cell libraries  
130 were infected with reovirus strains type 1 Lang (T1L) and type 3 Dearing (T3D) and  
131 cultured for nine days prior to isolation of genomic DNA (gDNA) from surviving cells and  
132 deep sequencing. STARS analysis was conducted to identify enriched CRISPR gRNAs  
133 within the surviving cell population (Fig. 1A and Table S1). The siRNA screen was  
134 conducted using HeLa S3 cells transfected with the ON-TARGET plus siRNA whole  
135 genome library targeting over 18,000 genes (35). Transfected cells were infected with  
136 reovirus strain T3SA+ and scored for viability using an ATP-dependent luminescence  
137 assay. T3SA+ contains nine genes from T1L and the S1 gene from strain T3C44-MA  
138 (36). T3SA+ binds all known reovirus receptors. Robust Z scores (median absolute  
139 deviation) were calculated for each sample (Fig. 1B and Table S2).

140 Key genes and pathways essential for reovirus replication were defined by  
141 comparing the CRISPR/Cas-9 and siRNA screen lists using STRING-db (Fig. 1C). In  
142 the CRISPR/Cas-9 screen, four functional pathways defined by Gene Ontology (GO)  
143 terms were common to both T1L and T3D, including sialic acid biosynthesis and  
144 metabolism (Fig. 1D). Sialic acid is a reovirus attachment factor, and genes involved in  
145 sialic acid biosynthesis and metabolism, including *Slc35a1*, are required for T3SA+  
146 replication in BV2 cells (37). These data provide confidence that the target genes  
147 identified in the CRISPR/Cas-9 screen represent biologically significant candidates. We  
148 also compared KEGG pathways identified in the CRISPR/Cas-9 and siRNA screens to

149 increase the likelihood of significant gene targets. Ribosome and lysosome pathways  
150 were the only pathways common to both screens (Fig. 1E). Lysosomal genes include  
151 *Ctsl*, *Neu1*, and *Npc1*. *Ctsl* encodes cathepsin L, which is required for cleavage of the  
152 reovirus outer capsid to form ISVPs (22). *Neu1* encodes neuraminidase, a lysosomal  
153 sialidase that cleaves sialic acid linkages required for reovirus infectivity (38). *Npc1*  
154 encodes NPC1, a cholesterol transporter that resides in the limiting membrane of  
155 endosomes and lysosomes (33, 34).

### 156 **Engineering and characterization of HBMECs with CRISPR-targeted *Npc1*.**

157 Based on the function of NPC1 in cell entry and replication of other viruses (39) and its  
158 identification in both our CRISPR and siRNA screens, we evaluated a potential role for  
159 NPC1 in reovirus replication. Human brain microvascular endothelial cells (HBMECs)  
160 are susceptible to reovirus infection (40) and amenable to CRISPR/Cas-9 gene editing  
161 (41). To facilitate these studies, we used CRISPR/Cas-9 gene editing to engineer a  
162 clonal HBMEC cell line lacking the *NPC1* gene (KO cells). The NPC1 KO cells were  
163 complemented by stable transfection of a functional NPC1 allele (KO+ cells).

164 The newly engineered NPC1 KO and KO+ cell lines were characterized for  
165 NPC1 expression and cholesterol distribution relative to wild-type (WT) HBMECs.  
166 Expression of NPC1 in WT, KO, and KO+ cells was determined by immunoblotting. As  
167 anticipated, NPC1 expression in KO cells was abrogated relative to WT and KO+ cells  
168 (Fig. S1A). There was an observable increase in NPC1 expression in KO+ cells  
169 compared with WT cells (Fig. S1B), but the difference was not statistically significant. In  
170 the absence of functional NPC1, cholesterol reorganizes from a homogeneous  
171 distribution to accumulate in endosomal compartments (32, 33). To define the  
172 distribution of cholesterol in NPC1-null HBMECs, we used fluorescent filipin III to label  
173 cholesterol in fixed cells and imaged cholesterol distribution using fluorescence



174 microscopy (Fig. S1C). As anticipated, cholesterol distribution was homogeneous in WT  
175 (Fig. S1C, left) and KO+ cells (Fig. S1C, right). However, cholesterol accumulated  
176 around the nucleus in KO cells (Fig. S1C, center) in a pattern consistent with the  
177 distribution of endosomes (Fig. S1D), confirming the absence of functional NPC1. Thus,  
178 KO cells display the expected phenotype of altered cholesterol distribution when NPC1-  
179 dependent cholesterol transport is disrupted. Furthermore, complementing NPC1  
180 expression in KO cells restores the normal distribution of cholesterol, demonstrating  
181 that the observed phenotype is specific for NPC1 expression.

182 **Reovirus infection by virions but not by ISVPs is impaired in NPC1 KO**  
183 **cells.** ISVPs prepared by treatment of virions *in vitro* with intestinal or endosomal  
184 proteases bind to reovirus receptors and enter target cells by direct penetration of the  
185 plasma membrane and bypass requirements for internalization into the endocytic  
186 compartment and acid-dependent proteolysis (21, 22, 42). To determine whether NPC1  
187 is required for reovirus replication, and further whether NPC1 mediates a step in the  
188 infectious cycle that differs between virions and ISVPs, we adsorbed WT, KO, and KO+  
189 cells with reovirus strain T1L M1 P208S virions or ISVPs. Reovirus T1L M1-P208S  
190 contains a point mutation in the M1 gene that causes viral factories to have a globular  
191 morphology similar to the morphology of factories formed by reovirus T3D (43), which  
192 renders infected cells easier to detect. Infected cells were visualized by  
193 immunofluorescence (IF) staining for reovirus antigen at 18 h post-adsorption (Fig. 2).  
194 Following adsorption with reovirus virions, the number of infected KO cells was reduced  
195 by approximately 50% relative to infected WT and KO+ cells (Fig. 2A). A similar  
196 reduction in the number of infected KO cells relative to WT and KO+ cells was observed  
197 when WT, KO, and KO+ cells were adsorbed with T1L, T3D, and T3SA+ virions, the  
198 reovirus strains used in the CRISPR/Cas9 and siRNA screens (Fig. S2). In contrast, no

199 significant differences in numbers of infected cells were observed following adsorption  
200 of WT, KO, and KO+ cells with ISVPs (Fig. 2B). Viral progeny production and release  
201 was determined by quantifying viral titers in cell lysates and supernatants at 0, 24, and  
202 48 h following adsorption of WT, KO, and KO+ cells with virions or ISVPs. Following  
203 infection by virions, viral titers in lysates and supernatants of KO cells were 10- to 100-  
204 fold less than those in WT and KO+ cells (Fig. 2C and E). In contrast, following infection  
205 by ISVPs, viral titers in lysates and supernatants of all three cell types were comparable  
206 (Fig. 2D and F). Together, these results suggest that NPC1 is required for reovirus  
207 infection and functions at a step in the infectious cycle that differs between virions and  
208 ISVPs.

209 **NPC1 is not required for reovirus attachment, internalization, or uncoating.**

210 Reovirus entry can be divided into four main stages: viral binding to cell-surface  
211 receptors, viral internalization by endocytosis, proteolytic removal of the viral outer  
212 capsid, and penetration of the core from late endosomes into the cytosol (19). We  
213 characterized NPC1 KO cells for the capacity to support each step of the reovirus entry  
214 pathway to define the function of NPC1 in reovirus infection. To determine whether  
215 NPC1 is required for reovirus attachment to target cells we quantified viral binding using  
216 flow cytometry. The quantity of virus bound to the surface of all three cell types was  
217 comparable, and no statistically significant differences were observed (Fig. 3A). These  
218 data suggest that reovirus attachment to cells is not dependent on expression of NPC1.

219 To determine whether NPC1 is required for reovirus to access the endocytic  
220 pathway of target cells, WT, KO, and KO+ cells were adsorbed with fluorescently-  
221 labeled reovirus particles and monitored for reovirus uptake using live-cell imaging. We  
222 found that kinetics of reovirus internalization into WT, KO, and KO+ cells were  
223 comparable. High-magnification videos (Videos 1, 2, and 3) along with static images

224 obtained at different intervals (Fig. 3B) demonstrate that attached reovirus particles  
225 internalize slowly in the first ~ 0 - 10 min post-adsorption. During this time, reovirus  
226 particles remain in the periphery, with a few particles coalescing to form large  
227 fluorescent puncta. Convergence of immunofluorescent signals suggests co-transport  
228 of multiple viral particles in the same endocytic compartment, similar to that observed  
229 during reovirus entry into neurons (44). After ~ 15 min post-adsorption, there was rapid  
230 recruitment of almost every fluorescent puncta to the perinuclear region.

231 To more precisely define the movement of reovirus virions during entry, we  
232 analyzed the trajectories of individual fluorescent virions in Videos 1, 2, and 3 over 36  
233 min using the Spot detector plugin function from Icy software. Trajectory colors change  
234 over time in which each color corresponds to an interval of ~ 7.5 min in the time-lapse  
235 videos (Videos 4, 5, and 6). Analysis of the time-dependent trajectories confirms  
236 observations made in the live-imaging videos. Video-microscopic analysis  
237 demonstrates that reovirus virions are internalized rapidly into HBMECs and that virion  
238 uptake into the endocytic pathway is not impaired in the absence of NPC1.

239 Following internalization of reovirus virions, acid-dependent cathepsin proteases  
240 in late endosomes catalyze disassembly. During disassembly, proteolytic cleavage of  
241 the outermost capsid protein,  $\sigma 3$ , exposes the membrane-penetration protein,  $\mu 1$ , which  
242 is subsequently cleaved to form a variety of intermediates that lead to penetration of the  
243 core particle into the cytoplasm (20-24, 27-30). Cells lacking NPC1 have increased  
244 endosomal pH and decreased cathepsin activity (45), which could impair reovirus  
245 uncoating. To determine whether NPC1 is required for reovirus disassembly, we  
246 defined the kinetics of reovirus outer-capsid proteolysis by following the formation of the  
247  $\delta$  cleavage fragment of the  $\mu 1$  protein in WT, KO, and KO+ cells. Cells were adsorbed  
248 with reovirus virions, and viral proteins in cell lysates were visualized by immunoblotting

249 at 0, 1, 2, and 3 h post-adsorption using a reovirus-specific antiserum. No significant  
250 differences in the kinetics of  $\mu 1$  proteolysis were observed, with an initial  $\delta$  cleavage  
251 product detected 2 h after adsorption in WT, KO, and KO+ cells (Fig. 3C). These data  
252 suggest that the cathepsins that catalyze reovirus disassembly are not impaired in  
253 NPC1 KO HBMECs. Collectively, these results demonstrate that NPC1 is not required  
254 for reovirus receptor binding, internalization, or disassembly.

255 **Escape of reovirus cores from endosomes is impaired in cells lacking**  
256 **NPC1.** To determine whether NPC1 is required for escape of reovirus cores into the  
257 cytoplasm following disassembly in the endocytic compartment, we imaged cores in  
258 fixed cells by IF. Cells were adsorbed with fluorescently labeled reovirus virions and  
259 incubated in the presence of cycloheximide for 8 h post-adsorption to inhibit synthesis  
260 of new viral proteins and thus ensure detection of proteins from infecting viral particles.  
261 Cells were stained with a CD-63-specific antibody to label endosomes and an  
262 antiserum specific for reovirus cores and imaged using confocal microscopy. Small  
263 puncta consistent with reovirus cores were observed in WT and KO+ cells, while in KO  
264 cells, cores appeared to accumulate in larger puncta corresponding to endosomes (Fig.  
265 4A). The distribution of virions, cores, and endosomes was determined to quantify the  
266 extent of colocalization. The results demonstrate a strong colocalization of cores and  
267 endosomes in KO cells (Manders coefficient [Mc]:  $\sim 0.7$ ), while there was much less  
268 colocalization of cores and endosomes in WT and KO+ cells (Mc:  $\sim 0.3$ ) (Fig. 4B).  
269 Colocalization of virions and cores also was more frequent in KO cells (Mc:  $\sim 0.45$ ) cells  
270 than in WT (Mc:  $\sim 0.15$ ) or KO+ (Mc:  $\sim 0.2$ ) cells, whereas colocalization of virions and  
271 endosomes was comparable in all cell types (Mc:  $\sim 0.6$ ). These data suggest that  
272 escape of cores from endosomes is less efficient in the absence of NPC1.

273 To complement the imaging experiments, we quantified newly synthesized viral  
274 s4 mRNA using RT-qPCR. WT, KO, and KO+ cells were adsorbed with reovirus, RNA  
275 was isolated, and s4 transcripts were quantified at 0, 6, 12, and 24 h post-adsorption.  
276 We observed a statistically significant increase in total s4 RNA in WT and KO+ cells at  
277 12 and 24 h post-adsorption relative to KO cells (Fig. 5). Together, these results  
278 suggest that NPC1 is required for release of transcriptionally active reovirus cores from  
279 endosomes into the cytoplasm.

280 **Cholesterol homeostasis is required for reovirus entry.** We thought it  
281 possible that NPC1 could serve as an endosomal receptor for reovirus and interact with  
282 one or more viral capsid proteins to enable core delivery into the cytoplasm, analogous  
283 to the function of NPC1 in Ebola virus infection (46, 47). Alternatively, NPC1 might be  
284 required to maintain an endosomal environment with appropriate cholesterol levels to  
285 allow cores to penetrate endosomes. To distinguish between these possibilities, we  
286 tested whether hydroxypropyl- $\beta$ -cyclodextrin (H $\beta$ CD), a cyclic oligosaccharide that  
287 triggers cholesterol release from the endo-lysosomal compartment (48, 49) and has  
288 shown efficacy in the treatment of the Niemann Pick type C disease (50, 51), for the  
289 capacity to overcome the effects of NPC1 deficiency on reovirus infection. To determine  
290 whether H $\beta$ CD treatment redistributes cholesterol from endosomal membranes to a  
291 homogeneous distribution in the absence of NPC1, NPC1 KO HBMECs were treated  
292 with 1 mM H $\beta$ CD, a non-toxic concentration (Fig. S3A), or PBS for 48 h prior to staining  
293 for the filipin III complex. Cells displaying cholesterol accumulation were distinguished  
294 from those with widely distributed cholesterol by quantifying the mean fluorescence  
295 intensity (MFI) of filipin III complex staining. Using this approach, an increase in MFI  
296 correlates with an increase in cholesterol accumulation. After H $\beta$ CD treatment, KO cells  
297 displayed a significant redistribution of cholesterol, reducing its accumulation in

298 endosomes and enhancing its distribution broadly throughout the cell, correlating with a  
299 statistically significant decrease in MFI (Fig. S3B,C). These data demonstrate that  
300 H $\beta$ CD treatment promotes cholesterol efflux in KO cells, resulting in a cholesterol-  
301 distribution phenotype comparable to WT and KO+ cells (Fig. S3C).

302         Once we observed that H $\beta$ CD treatment effectively redistributes cholesterol in  
303 KO cells and, thus, functionally complements NPC1 deficiency, we tested whether the  
304 reovirus entry defect in KO cells is due to the absence of NPC1 or impaired cholesterol  
305 homeostasis. WT, KO, and KO+ cells were pre-treated with 1 mM H $\beta$ CD or PBS for 24  
306 h, adsorbed with reovirus virions or ISVPs, and scored for reovirus infection by  
307 immunostaining. Remarkably, H $\beta$ CD treatment rescued infection of KO cells by reovirus  
308 virions (Fig. 6) but did not appreciably affect infection of WT or KO+ cells. H $\beta$ CD  
309 treatment also did not affect infection of WT, KO, or KO+ cells by ISVPs. These data  
310 demonstrate that endosomal cholesterol homeostasis regulates reovirus entry by  
311 enhancing penetration of the reovirus core particle into the cytoplasm.

## 312 **DISCUSSION**

313 In this study, we identified NPC1 as a putative host factor required for reovirus infection  
314 using genome-wide CRISPR/Cas9 and siRNA-based cell-survival screens. NPC1 is an  
315 endolysosomal cholesterol transporter that mediates cholesterol homeostasis (32-34).  
316 Disruption of NPC1 results in cholesterol accumulation in late endosomes (Sup. Fig.  
317 2C) and leads to Niemann-Pick type C disease (NPCD), an autosomal-recessive  
318 neurodegenerative disorder (32). Early steps in reovirus infection, including receptor  
319 binding, acid-dependent proteolytic disassembly, and ISVP-to-ISVP\* conversion have  
320 been well characterized (19). However, penetration of endosomal membranes and  
321 release of viral cores into the cytoplasm are poorly understood processes. We used  
322 CRISPR/Cas9 gene-targeted HBMECs lacking NPC1 expression to study the function  
323 of NPC1 in reovirus infection. We discovered that NPC1 is dispensable for viral binding  
324 to cell-surface receptors (Fig. 3A), internalization of viral particles (Fig. 3B), and  
325 disassembly of the viral outer capsid (Fig. 3C). However, NPC1 is required for efficient  
326 penetration of reovirus cores into the cytoplasm (Fig. 4). Treatment with H $\beta$ CD reduces  
327 cholesterol accumulation in endosomes (Sup. Fig. 3B and 3C) and restores reovirus  
328 infectivity in NPC1 KO cells (Fig. 6). These findings suggest that regulation of  
329 cholesterol in endosomal compartments is essential for reovirus entry into host cells.

330 NPC1 is required for the replication of several enveloped viruses. The filoviruses  
331 Ebola virus and Marburg virus use NPC1 as an intracellular receptor (46, 47). NPC1  
332 also functions in enveloped virus replication by maintaining cholesterol homeostasis.  
333 Disruption of cholesterol homeostasis by inhibiting NPC1 prevents entry and replication  
334 of dengue virus (52) and African swine fever virus (53) and impairs exosome-dependent  
335 release of hepatitis C virus (54). Additionally, NPC1 has been implicated in entry of  
336 quasi-enveloped forms of hepatitis A virus and hepatitis E virus (55, 56). However,

337 NPC1 had not been previously appreciated to function in the replication of a  
338 nonenveloped virus.

339 We found that reovirus binding, internalization, and uncoating do not require  
340 NPC1, suggesting that NPC1 does not function as an intracellular receptor for reovirus.  
341 Instead, we found that cholesterol accumulation in the endocytic pathway diminishes  
342 the efficiency of reovirus core release into the cytoplasm. Using confocal microscopy,  
343 we visualized and quantified the distribution of fluoresceinated reovirus virions, reovirus  
344 cores, and late endosomes in infected cells (Fig. 4). Reovirus cores accumulate in the  
345 lumen of late endosomes in KO cells (Fig. 4A), while virions distribute to endosomes  
346 comparably in KO, WT, and KO+ (Fig. 4B). These findings suggest that cores do not  
347 escape from endosomes efficiently in the absence of NPC1. RNA synthesis, which  
348 occurs in the cytoplasm following release of cores from late endosomes, also was  
349 reduced in KO cells relative to WT and KO+ cells (Fig. 5), providing evidence that core  
350 escape from endosomes is required for initiation of transcription. It is not apparent how  
351 cholesterol accumulation in KO cells blocks core release from late endosomes.

352 In NPCD, disruption of cholesterol homeostasis causes changes in lipid  
353 composition of endosomal membranes (57, 58), inverting the ratio of phosphatidyl  
354 choline (PC) and phosphatidyl ethanolamine (PE). The change in PC:PE ratio may alter  
355 mechanical properties of endosomal membranes by inhibiting intra-endosomal  
356 membrane dynamics to favor negative curvature (57, 59). Membrane composition and  
357 dynamics can influence viral entry. Negative membrane curvature induced by addition  
358 of PE or the action of interferon induced transmembrane protein 3 (IFITM3) impairs  
359 adenovirus protein VI-mediated membrane disruption (60) and enveloped virus fusion  
360 (61), respectively. Although clearly nonenveloped, reovirus entry also is inhibited by  
361 IFITM3 (62). Many nonenveloped viruses use membrane-modifying proteins with the



362 capacity to interact, destabilize, and disrupt membranes to mediate genome release  
363 into the cytoplasm (12, 63). However, the role of specific lipids in these processes is not  
364 well defined.

365         During reovirus entry, ISVP-to-ISVP\* conversion leads to release of  
366 myristoylated  $\mu$ 1N, which interacts with late endosomal membranes to facilitate release  
367 of cores into the cytoplasm (20-24). PE and PC concentrations in liposomes influence  
368 the efficiency of ISVP-to-ISVP\* conversion (25). Therefore, it is possible that changes in  
369 membrane fluidity, width, or curvature caused by inversion of endosomal membrane  
370 PC:PE ratio in NPC1 KO cells impedes membrane insertion of  $\mu$ 1N or formation and  
371 expansion of the penetration pore. Additionally, accumulation of cholesterol within the  
372 endosomal compartment of NPC1 KO cells could limit recruitment of ISVP\*s to  
373 membrane-inserted  $\mu$ 1N and the subsequent penetration of reovirus cores. Within the  
374 *Reoviridae* family, bluetongue virus (BTV) outer-capsid protein VP5 penetrates late  
375 endosomal membranes enriched in phospholipid lysobisphosphatidic acid (LBPA),  
376 which is dependent on the anionic charge and membrane fluidic properties of LBPA  
377 (64). LBPA enriched late endosomes are also required for efficient rotavirus entry (65).  
378 Our data demonstrating the importance of cholesterol homeostasis in reovirus entry  
379 along with the role of LBPA in BTV and rotavirus entry suggest that lipid composition of  
380 late endosomes influences nonenveloped virus entry and illuminate a potential new  
381 target for antiviral therapy.

382         Our findings parallel those of a companion study indicating a function for WD  
383 repeat-containing protein 81 (WDR81) in reovirus entry (66). WDR81 was identified in a  
384 CRISPR/Cas9 cell-survival screen using mouse embryo fibroblasts and found to be  
385 required for a step in reovirus entry that follows ISVP formation. WDR81 is required for  
386 the maturation of late endosomes by modulating levels of phosphatidylinositol 3-

387 phosphate (67). These findings, coupled with our studies of NPC1, suggest that ISVPs  
388 formed in an altered endocytic compartment of cells lacking either WDR81 or NPC1  
389 cannot launch replication, whereas ISVPs adsorbed to the surface of such cells can.  
390 We think that alterations in cholesterol distribution might govern this difference in ISVP  
391 behavior.

392 Cholesterol accumulation due to NPC1 dysfunction also can lead to alterations in  
393 the distribution of host proteins, such as annexin A2 (ANXA2), which was identified in  
394 our siRNA screen, and annexin A6 (ANXA6) (68). ANXA2 and ANXA6 are  
395 multifunctional proteins involved in endosomal trafficking, segregation of membrane  
396 lipids, and membrane curvature regulation through membrane-cytoskeleton  
397 rearrangements (69). Disruption of NPC1 leads to increased concentrations of ANXA2  
398 and ANXA6 in late endosomes in response to cholesterol accumulation (70, 71). It is  
399 possible that cholesterol accumulation in cells lacking NPC1 similarly alters the  
400 distribution or function of WDR81. Thus, dysfunction of endosomal proteins in NPC1-  
401 null cells might alter potential interactions of  $\mu$ 1N or the reovirus core with specific lipid  
402 microdomains or proteins and inhibit core release.

403 Genetic screens are useful approaches to identify host factors required for viral  
404 replication and provide valuable information about virus-cell interactions (72, 73).  
405 However, genetic screens frequently yield long lists of potential candidates, many of  
406 which are false-positives. To increase the likelihood of identifying host factors required  
407 for reovirus replication, we compared gene lists obtained from independent genome-  
408 wide CRISPR/Cas9 and siRNA-based cell-survival screens. Only 28 genes in the  
409 CRISPR/Cas9 screens using strains T1L and T3D were identified in the siRNA screen  
410 using strain T3SA+, 19 of which are ribosomal genes (Fig. 1B, C). Of the nine non-  
411 ribosomal genes, several encode proteins required for reovirus entry, including those

412 involved in sialic acid biosynthesis and metabolism (*Nans* and *Neu*) (37, 38) and viral  
413 disassembly (*CtsI*) (22).

414           Our findings indicate that NPC1, which was identified in both CRISPR/Cas9 and  
415 siRNA screens, is required for efficient release of reovirus cores into the cytoplasm by  
416 regulating cholesterol homeostasis. High-resolution studies showing the precise  
417 distribution of reovirus virions and cores within endosomes will be required to  
418 understand how NPC1 and cholesterol homeostasis regulate core release. These  
419 studies will allow us to answer the following new questions: Do cores interact with  
420 endosomal membranes in KO cells? Does cholesterol impede interactions of cores with  
421 membranes? Are other lipids or proteins required for core release? Our ongoing work to  
422 answer these questions will clarify the functional elements of the reovirus entry pathway  
423 and lead to new approaches to block the entry of viruses that depend on tightly  
424 regulated cholesterol distribution in the endocytic pathway.

425

426

## 427 **MATERIALS AND METHODS**

### 428 **Cells and viruses**

429 HBMECs were cultured in growth medium (RPMI 1640 (Gibco) supplemented to  
430 contain 10% fetal bovine serum (FBS; VWR 97068-085), 10% Nu Serum (Corning), 1%  
431 MEM-vitamins (Corning), 1% sodium pyruvate (Gibco), 1% MEM non-essential amino  
432 acids (Gibco), 1% L-glutamine (Gibco), 1% penicillin/streptomycin (Gibco), and 0.1%  
433 amphotericin B (Sigma)) or infection medium (growth medium containing 2% FBS). BV2  
434 mouse microglial cells were cultured in BV2 maintenance medium (DMEM  
435 supplemented to contain 10% FBS, 1% penicillin/streptomycin, 1% sodium pyruvate,  
436 and 1% sodium bicarbonate) or selection medium (maintenance media supplemented  
437 with 4 µg/ml blasticidin (Thermo Fisher) and 2.5 µg/ml puromycin (Sigma-Aldrich)).  
438 HeLa cells were cultured in Dulbecco modified Eagle medium (Gibco) supplemented to  
439 contain 10% FBS, minimal essential medium nonessential amino acid solution (Gibco),  
440 0.11 mg/mL of sodium pyruvate (Gibco), and 1% penicillin/ streptomycin, and 0.1%  
441 amphotericin B (Sigma). Spinner-adapted L929 cells (originally obtained from the  
442 Bernard Fields laboratory; ATCC CCL-1) were grown in either suspension or  
443 monolayers in Joklik's modified Eagle's minimal essential medium (US Biological;  
444 M3867) supplemented to contain 5% FBS, 2 mM L-glutamine, 100 units/ml penicillin,  
445 100 µg/ml streptomycin, and 0.1% amphotericin B.

446 Reovirus strains T1L, T3D, T3SA+, and T1L M1-P208S, were prepared from  
447 laboratory stocks by plaque purification followed by 3 to 4 passages in L929 cells.  
448 T3SA+ contains nine genes from T1L and the S1 gene from T3C44-MA (36). T1L M1-  
449 P208S contains a point mutation in the M1 gene that causes viral factories to have a  
450 globular morphology similar to the morphology of factories formed by reovirus T3D (43)

451 and can be readily scored for infection. Virions were purified from infected L929 cell  
452 lysates using cesium chloride gradient centrifugation as described (74). Viral titers were  
453 determined by plaque assay using L929 cells (75) and expressed as plaque forming  
454 units per ml (PFU/ml). Reovirus particle concentration was estimated by spectral  
455 absorbance of purified virions at 260 nm (optical density at 260 nm [OD<sub>260</sub>] of 1 =  
456 2.1x10<sup>12</sup> particles/ml) (76).

457         Fluorescent reovirus particles were prepared by diluting 6 × 10<sup>12</sup> reovirus  
458 particles/ml in 50 mM sodium bicarbonate buffer and incubating with 20 μM Alexa  
459 Fluor™ 647 NHS Ester (Succinimidyl Ester) (Invitrogen, A37573) at room temperature  
460 (RT) for 90 min, protected from light (77). Labeled virions were dialyzed at 4°C  
461 overnight with 2-3 buffer exchanges to remove unreacted dye.

462         ISVPs were prepared by incubating 2 × 10<sup>12</sup> purified reovirus particles with 200  
463 μg/mL chymotrypsin (Sigma, C3142) at 37°C for 60 min (23). Digestion was terminated  
464 by the addition of PMSF to a final concentration of 2 mM. Virion-to-ISVP conversion  
465 was confirmed by SDS-PAGE and colloidal blue staining to assess the loss of σ3 and  
466 cleavage of μ1C to δ.

467

## 468 **Antibodies and dyes**

469 Primary antibodies used for indirect immunofluorescence include anti-CD63 (1:250)  
470 (ThermoFisher, #10628D), reovirus-specific polyclonal rabbit antiserum (1:1000) (78),  
471 and T1L core-specific rabbit antiserum (1:250) provided by Max Nibert (79). Alexa Fluor  
472 conjugated secondary antibodies (Thermo Fisher, #A11034, #A11030) were used to  
473 visualize antigen. Nuclei were stained with 4',6-diamidino-2-phenylindole (DAPI,  
474 Invitrogen, D3571). Primary antibodies used for immunoblotting include reovirus-  
475 specific polyclonal rabbit antiserum, NPC1-specific polyclonal rabbit antiserum (Abcam,

476 134113), and mouse GAPDH monoclonal antibody for protein loading controls (Sigma,  
477 G8795). Anti-mouse IRDye680RD and anti-rabbit IRDye800CW (Licor) secondary  
478 antibodies were used.

479

#### 480 **CRISPR Screen**

481 The screen was conducted and transduction validated as described (80). BV2 cells  
482 were transduced with pXPR\_101 lentivirus encoding Cas9 (Addgene; 52962) and  
483 propagated for 11 days with BV2 Maintenance Medium supplemented to contain  
484 blasticidin. These parental BV2 or BV2-Cas9 cells were transduced for 2 days with  
485 pXPR\_011 expressing eGFP (Addgene; 59702) and a short guide RNA (sgRNA)  
486 targeting eGFP at a multiplicity of infection (MOI) of less than 1 PFU/cell. Cells were  
487 selected for 5 days with BV2 selection medium. The frequency of eGFP-expressing  
488 cells was quantified by flow cytometry.

489 The murine Asiago sgRNA CRISPR library contains six independent genome-  
490 wide pools, in which each pool contains unique sgRNAs targeting 20,077 mouse genes.  
491 Four pools of the Asiago library were transduced into  $5 \times 10^7$  BV2 cells at an MOI of 0.2  
492 PFU/cell to establish four BV2 libraries. Two days post-transduction, cells were  
493 transferred to BV2 Selection Medium and propagated for 5 additional days. For each  
494 experimental condition,  $10^7$  BV2 library cells expressing Cas9 and sgRNAs were  
495 seeded in duplicate into T175 tissue culture flasks (Greiner Bio-One). Cells were  
496 inoculated with Opti-MEM supplemented to contain PBS (mock) or reovirus strains T1L  
497 or T3D at an MOI of 100 PFU/cell. Cells were incubated at RT for 1 h, followed by the  
498 addition of 20 mL of DMEM supplemented to contain 10% FBS, 1%  
499 penicillin/streptomycin, 1% sodium pyruvate, and 1% sodium bicarbonate. After 2 days  
500 post-inoculation (dpi) (mock) or 9 dpi (T1L or T3D conditions), cells were harvested and

501 genomic DNA (gDNA) was isolated from surviving cells using a QIAmp DNA Mini Kit  
502 (QIAGEN) according to the manufacturer's instructions.

503

#### 504 **CRISPR screen sequencing and analysis**

505 Illumina sequencing and STARS analyses were conducted as described (81). The  
506 gDNA was aliquoted into a 96-well plate (Greiner Bio-One) with up to 10 µg gDNA in 50  
507 µL of total volume per well. A polymerase chain reaction (PCR) master mix containing  
508 ExTaq DNA polymerase (Clontech), ExTaq buffer (Clontech), dNTPs, P5 stagger  
509 primer, and water was prepared. PCR master mix (40 µL) and 10 µL of a barcoded  
510 primer were added to each well containing gDNA. Samples were amplified using the  
511 following protocol: 95°C for 1 min, followed by 28 cycles of 94°C for 50 s, 52.5°C for 30  
512 s, and 72°C for 30 s, and ending with a final 72°C extension for 10 min. PCR product  
513 was purified using Agencourt AMPure XP SPRI beads (Beckman Coulter) according to  
514 the manufacturer's instructions. Samples were sequenced using a HiSeq 2000  
515 (Illumina). Following deconvolution of the barcodes in the P7 primer, sgRNA sequences  
516 were mapped to a reference file of sgRNAs from the Asiago library. To account for the  
517 varying number of reads per condition, read counts per sgRNA were normalized to 10<sup>7</sup>  
518 total reads per sample. Normalized values were then log-2 transformed. sgRNAs that  
519 were not detected were arbitrarily assigned a read count of 1. sgRNA frequencies were  
520 analyzed using STARS software to produce a rank ordered score for each gene. This  
521 score correlated with the sgRNA candidates that were above 10% of the total  
522 sequenced sgRNAs. Genes scoring above this threshold in either of the two  
523 independent subpools and in at least two of the four independent genome-wide pools  
524 were assigned a STAR score. In addition to the STAR score, screen results were

525 compared using false discovery rate (FDR) analyses to monitor gene-specific signal  
526 versus background noise. Statistical values of independent replicates were averaged.

527

### 528 **Whole genome siRNA screen and analysis**

529 The whole genome siRNA screen was conducted as described (35) using HeLa S3  
530 cells and the Dharmacon ON-TARGETplus® SMARTpool® human siRNA library  
531 (Thermo Scientific) and strain T3SA+.

532

### 533 **Production of NPC1 KO and KO+ cell lines**

534 HBMEC single-cell clones with ablation of the *NPC1* gene were engineered using  
535 CRISPR/Cas9-mediated gene editing as described (82) using an NPC1-specific gRNA  
536 (5' GGCCTTGTCATTACTIONTGGAGGGGG 3', targeting nucleotides 768-790 of the human  
537 NPC1 mRNA). Single-cell clones were screened for the loss of NPC1 function by filipin  
538 III staining (82). Genotype of the selected NPC1 KO clones was confirmed by Sanger  
539 sequencing followed by amplification of the genomic DNA sequences flanking the  
540 gRNA target site using forward (5' TCATAAACACACCAACTIONTGGGAATC 3') and  
541 reverse (5' TCCTGCGGCAGAGGTTTTTC 3') primers. Sequences of the NPC1 alleles  
542 were deconvoluted using CRISP-ID (83). To confirm the specificity of *Npc1* knockout,  
543 cells of a single clone were transduced with a retrovirus vector (pBabe-Puro)  
544 expressing human NPC1 as described (47).

545

### 546 **Indirect immunofluorescence staining**

547 Cells were fixed with 4% paraformaldehyde (PFA, Electron Microscopy Sciences,  
548 15712-s) in PBS<sup>-/-</sup> at RT for 20 min, washed three times with PBS<sup>-/-</sup>, and permeabilized  
549 and blocked with 0.1% Triton X-100 and 2% FBS in PBS<sup>-/-</sup> at RT for 20 min. Cells were



550 incubated sequentially with primary antibody, Alexa Fluor-conjugated secondary  
551 antibody, and DAPI diluted in PBS<sup>-/-</sup> containing 0.1% Triton X-100 and 2% FBS at RT  
552 for 30 to 60 min. For cholesterol labeling, fixed and permeabilized cells were incubated  
553 with 50 µg/ml filipin III (Sigma, SAE0088) diluted in PBS<sup>-/-</sup> for 30 min. Coverslips were  
554 mounted using Prolong-gold (Molecular Probes). Confocal images were captured using  
555 a Leica-SP8 laser scanning confocal microscope equipped with an HCX PL APO  
556 63X/1.4 N.A oil objective and processed using Fiji/ImageJ software.

557

### 558 **SDS-PAGE and Immunoblotting**

559 Cells harvested for protein extraction were lysed in Radioimmunoprecipitation Assay  
560 buffer (*RIPA buffer*; Thermo Fisher) supplemented with 1X protease inhibitors (Thermo  
561 Fisher). Protein concentration was quantified by Bradford assay (Bio-Rad) following the  
562 manufacturer's protocol. Samples for SDS-PAGE were diluted in 5X Laemmli sample  
563 buffer (Bio-Rad) containing 10% β-mercaptoethanol and incubated at 95°C for 10 min.  
564 Samples for detection of NPC1 were incubated at 70°C for 10 min to prevent  
565 aggregation. Equal amounts of protein were electrophoresed in 10% or 4-20% Mini-  
566 Protean TGX gels (Bio-Rad). Following electrophoresis, proteins were transferred to  
567 nitrocellulose membranes (Bio-Rad) for immunoblotting. Nitrocellulose membranes  
568 were incubated with 5% nonfat milk in TBS (50 mM Tris-HCl, pH 7.6; 150 mM NaCl)  
569 with 0.1% Tween 20 (TBS-T) and sequentially incubated with primary and secondary  
570 antibodies diluted in TBS-T at RT for 1 h. Immunoblot images were captured using an  
571 Odyssey CLx imaging system (Li-Cor) and protein bands were quantified using the  
572 Image Studio Lite software. Protein expression levels were normalized to GAPDH  
573 loading controls.

574

575 **Quantification of reovirus infectivity**

576 In experiments comparing infectivity of reovirus in KO, KO+, and WT HBMECs, cells  
577 were adsorbed with 10,000 reovirus virions or 100 ISVPs diluted in Opti-MEM  
578 (Invitrogen) at 37°C for 1 h. Following adsorption, the inoculum was removed, and cells  
579 were incubated in infection medium for 18 h before fixing in ice-cold methanol. In  
580 experiments comparing reovirus infectivity in the presence or absence of H $\beta$ CD, cells  
581 were treated with 1 mM H $\beta$ CD or PBS for 24 h prior to adsorption with reovirus.  
582 Following adsorption, fresh 1 mM H $\beta$ CD was added to the medium for 18 h before fixing  
583 in ice-cold methanol. Fixed cells were washed with PBS<sup>-/-</sup>, blocked with 1% bovine  
584 serum albumin (BSA), and incubated sequentially with reovirus-specific polyclonal  
585 rabbit antiserum, Alexa Fluor 488-conjugated anti-rabbit antibody, and DAPI in PBS<sup>-/-</sup>  
586 containing 0.5% Triton X-100. Cells were imaged using a Lionheart FX automated  
587 imager (BioTek) equipped with a 20X air objective, taking four fields-of-view from  
588 duplicate samples. Images were processed and signals quantified using Gen5+  
589 software (BioTek).

590

591 **Viral binding**

592 KO, KO+, and WT HBMECs were detached from tissue-culture plates using  
593 CellStripper dissociation reagent (Corning), quenched with HBMEC medium, and  
594 washed with PBS<sup>-/-</sup>. Cells were resuspended in PBS<sup>-/-</sup> at 10<sup>6</sup> cells/ml and adsorbed with  
595 10,000 Alexa Fluor 647-labeled reovirus virions/cell at 4°C for 1 h with agitation. After  
596 binding, cells were washed twice with PBS<sup>-/-</sup> and fixed with 1% paraformaldehyde (PFA)  
597 supplemented with propidium iodide to determine cell viability. Cells were analyzed  
598 using an LSRII flow cytometer (BD Bioscience). Results were quantified using FlowJo  
599 V10 software.

600

### 601 **Live microscopy of reovirus internalization**

602 KO, KO+, and WT HBMECs were plated on glass-bottom p35 plates and adsorbed with  
603 10,000 Alexa 647-labeled reovirus virions/cell at 4°C for 45 min to synchronize  
604 infection. The inoculum was removed and replaced with fresh Opti-MEM without  
605 phenol-red medium supplemented with 2% FBS. Reovirus transport was imaged using  
606 a Leica DMI6000B fluorescence microscope with an HCX PL APO 63X/1.30 Gly  
607 objective. Fluorescence and brightfield images were collected from 0 to 40 min post  
608 adsorption every ~ 25 sec.

609

### 610 **Tracking of reovirus transport**

611 Automated tracking of fluorescent reovirus particles in time-lapse images was  
612 conducted using Icy bioimage analysis software. Regions of interest (ROI)  
613 corresponding to the cell periphery were selected for tracking analysis using the Spot  
614 Detector plugin (84). The scale of the object (reovirus cores) to be analyzed was set at  
615 a size of ~7 pixels per spot, and the threshold sensitivity was set at 100. Parameters  
616 describing transport dynamics were considered as both diffusive and directed for  
617 running tracking analysis. Results are presented in colored time-dependent tracks.

618

### 619 **Quantification of reovirus cores**

620 KO, KO+, and WT HBMECs were adsorbed with 10,000 Alexa Fluor 647-labeled  
621 reovirus virions at 37°C for 45 min. The inoculum was removed, and the cells were  
622 incubated in infection medium containing 100 µg/ml of cycloheximide for 8 h. After  
623 fixation, cells were permeabilized and stained with T1L core-specific rabbit polyclonal  
624 serum and anti-CD63 antibody. Confocal images were captured using a Leica-SP8

625 laser scanning confocal microscope equipped with an HCX PL APO 63X/1.4 N.A oil  
626 objective and processed using Fiji/ImageJ software. Colocalization of fluorescent  
627 reovirus virions (cyan puncta), reovirus cores (green puncta), and late endosomes (red  
628 puncta) was analyzed to differentiate infecting virions from cores released into the  
629 cytoplasm.

630

### 631 **RNA extraction and purification**

632 Cells were lysed using TRIzol reagent (Invitrogen). RNA was extracted with chloroform  
633 and purified using a PureLink RNA minikit (Invitrogen) with DNase treatment according  
634 to the manufacturer's instructions.

635

### 636 **S4 quantitative RT-PCR**

637 Total S4 RNA was quantified using qScript XLT one-step RT-qPCR ToughMix, Low  
638 ROX (Quanta Bioscience) and T3D\_S4\_qPCR primers (Forward:  
639 GAAGCATTTGCCTCACCATAG, Reverse: GATCTGTCCAACCTTGAGTGTATTG)  
640 according to the manufacturer's instructions. The following RT-qPCR cycling protocol  
641 was used: cDNA synthesis (50°C for 10 min), initial denaturation (95°C for 1 min), and  
642 40 PCR cycles (95°C for 10 s followed by a data collection step at 60°C for 1 min). S4  
643 cDNA was detected using a fluorogenic probe (5'-FAM [fluorescent fluorescein]-  
644 AGCGCGCAAGAGGGATGGGA-BHQ [black hole quencher]-1-3'; Biosearch  
645 Technologies).

646

### 647 **Statistical analysis**

648 All data were analyzed using Graphpad Prism 8. Figure legends specify the number of  
649 experimental repeats and the statistical test applied for each analysis. Differences were  
650 considered statistically significant when  $P$  values were less than 0.05.

651 **ACKNOWLEDGEMENTS**

652 We thank members of the Dermody and Risco laboratories for many useful discussions.

653 We are grateful to the UPMC Children's Hospital of Pittsburgh Rangos Research

654 Center Cell Imaging Core Laboratory for assistance with microscopy. Special thanks to

655 Dr. Martin Sachse for expert advice and for critical review of the manuscript and to Drs.

656 Sylvia Gutiérrez-Erlandsson and Ana Oña for assistance with confocal microscopy.

657 This work was supported in part by Public Health Service award R01 AI032539

658 (C.R. and T.S.D.) and the Heinz Endowments (T.S.D.) and grants BIO2015-68758-R

659 and RTI2018-094445-B-100 from the Ministry of Science and Innovation of Spain

660 (C.R.).

661

662 **AUTHOR CONTRIBUTIONS**

663 **Conceived and designed experiments:** POG, GT CR TSD. **Performed experiments:**

664 POG GT RKJ BAM RCO CBW. **Analyzed data:** POG GT. **Contributed**

665 **reagents/materials/analysis tools:** RKJ RCO CBW KC HWV. **Wrote original draft:**

666 POG, GT TSD. **Reviewed and edited paper:** POG GT RKJ RT IF BAM RCO CBW

667 PAB JS KC HWV CR TSD.

668

669 **REFERENCES**

- 670 1. Mercer J, Helenius A. Virus entry by macropinocytosis. *Nat Cell Biol.*  
671 2009;11(5):510-20.
- 672 2. Mercer J, Schelhaas M, Helenius A. Virus entry by endocytosis. *Annu Rev*  
673 *Biochem.* 2010;79:803-33.
- 674 3. Yamauchi Y, Helenius A. Virus entry at a glance. *J Cell Sci.* 2013;126(Pt  
675 6):1289-95.
- 676 4. Smith AE, Helenius A. How viruses enter animal cells. *Science.*  
677 2004;304(5668):237-42.
- 678 5. Tsai B. Penetration of nonenveloped viruses into the cytoplasm. *Annual review of*  
679 *cell and developmental biology.* 2007;23:23-43.
- 680 6. Staring J, Raaben M, Brummelkamp TR. Viral escape from endosomes and host  
681 detection at a glance. *J Cell Sci.* 2018;131(15).
- 682 7. Harrison SC. Viral membrane fusion. *Virology.* 2015;479-480:498-507.
- 683 8. White JM, Whittaker GR. Fusion of Enveloped Viruses in Endosomes. *Traffic.*  
684 2016;17(6):593-614.
- 685 9. Sieczkarski SB, Whittaker GR. Viral entry. *Current topics in microbiology and*  
686 *immunology.* 2005;285:1-23.
- 687 10. Plemper RK. Cell entry of enveloped viruses. *Current opinion in virology.*  
688 2011;1(2):92-100.
- 689 11. Stewart PL, Dermody TS, Nemerow GR. Structural basis of nonenveloped virus  
690 cell entry. *Advances in protein chemistry.* 2003;64:455-91.
- 691 12. Kumar CS, Dey D, Ghosh S, Banerjee M. Breach: Host Membrane Penetration  
692 and Entry by Nonenveloped Viruses. *Trends Microbiol.* 2018;26(6):525-37.
- 693 13. Banerjee M, Johnson JE. Activation, exposure and penetration of virally  
694 encoded, membrane-active polypeptides during non-enveloped virus entry. *Curr Protein*  
695 *Pept Sci.* 2008;9(1):16-27.
- 696 14. Bouziat R, Hinterleitner R, Brown JJ, Stencel-Baerenwald JE, Ikizler M, Mayassi  
697 T, et al. Reovirus infection triggers inflammatory responses to dietary antigens and  
698 development of celiac disease. *Science.* 2017;356(6333):44-50.
- 699 15. Dryden KA, Wang G, Yeager M, Nibert ML, Coombs KM, Furlong DB, et al. Early  
700 steps in reovirus infection are associated with dramatic changes in supramolecular  
701 structure and protein conformation: analysis of virions and subviral particles by  
702 cryoelectron microscopy and image reconstruction. *J Cell Biol.* 1993;122(5):1023-41.
- 703 16. Zhang X, Ji Y, Zhang L, Harrison SC, Marinescu DC, Nibert ML, et al. Features  
704 of reovirus outer capsid protein m1 revealed by electron cryomicroscopy and image  
705 reconstruction of the virion at 7.0 Å resolution. *Structure.* 2005;13(10):1545-57.

- 706 17. Dermody TS, Parker JS, Sherry B. Orthoreoviruses. In: Knipe DM, Howley PM,  
707 editors. *Fields Virology*. 2. 6th ed. Philadelphia: Lippincott Williams & Wilkins; 2013. p.  
708 1304-46.
- 709 18. Gummersheimer SL, Snyder AJ, Danthi P. Control of capsid transformations  
710 during reovirus entry. *Viruses*. 2021;13(2):153.
- 711 19. Roth AN, Aravamudhan P, Fernández de Castro I, Tenorio R, Risco C, Dermody  
712 TS. Ins and outs of reovirus: vesicular trafficking in viral entry and egress. *Trends*  
713 *Microbiol*. 2021;29(4):363-75.
- 714 20. Borsa J, Sargent MD, Lievaart PA, Copps TP. Reovirus: evidence for a second  
715 step in the intracellular uncoating and transcriptase activation process. *Virology*.  
716 1981;111(1):191-200.
- 717 21. Sturzenbecker LJ, Nibert ML, Furlong DB, Fields BN. Intracellular digestion of  
718 reovirus particles requires a low pH and is an essential step in the viral infectious cycle.  
719 *J Virol* 1987;61(8):2351-61.
- 720 22. Ebert DH, Deussing J, Peters C, Dermody TS. Cathepsin L and cathepsin B  
721 mediate reovirus disassembly in murine fibroblast cells. *J Biol Chem*.  
722 2002;277(27):24609-17.
- 723 23. Baer GS, Dermody TS. Mutations in reovirus outer-capsid protein s3 selected  
724 during persistent infections of L cells confer resistance to protease inhibitor E64. *J Virol*.  
725 1997;71:4921-8.
- 726 24. Silverstein SC, Astell C, Levin DH, Schonberg M, Acs G. The mechanism of  
727 reovirus uncoating and gene activation in vivo. *Virology*. 1972;47(3):797-806.
- 728 25. Snyder AJ, Danthi P. Lipid membranes facilitate conformational changes  
729 required for reovirus cell entry. *J Virol*. 2015;90(5):2628-38.
- 730 26. Snyder AJ, Danthi P. Lipids cooperate with the reovirus membrane penetration  
731 peptide to facilitate particle uncoating. *J Biol Chem*. 2016;291(52):26773-85.
- 732 27. Odegard AL, Chandran K, Zhang X, Parker JS, Baker TS, Nibert ML. Putative  
733 autocleavage of outer capsid protein m1, allowing release of myristoylated peptide m1N  
734 during particle uncoating, is critical for cell entry by reovirus. *J Virol*. 2004;78(16):8732-  
735 45.
- 736 28. Agosto MA, Ivanovic T, Nibert ML. Mammalian reovirus, a nonfusogenic  
737 nonenveloped virus, forms size-selective pores in a model membrane. *Proc Natl Acad*  
738 *Sci U S A*. 2006;103(44):16496-501.
- 739 29. Ivanovic T, Agosto MA, Zhang L, Chandran K, Harrison SC, Nibert ML. Peptides  
740 released from reovirus outer capsid form membrane pores that recruit virus particles.  
741 *EMBO J*. 2008;27(8):1289-98.
- 742 30. Chandran K, Farsetta DL, Nibert ML. Strategy for nonenveloped virus entry: a  
743 hydrophobic conformer of the reovirus membrane penetration protein m1 mediates  
744 membrane disruption. *J Virol*. 2002;76(19):9920-33.



- 745 31. Zhang L, Agosto MA, Ivanovic T, King DS, Nibert ML, Harrison SC.  
746 Requirements for the formation of membrane pores by the reovirus myristoylated  
747 micro1N peptide. *J Virol.* 2009;83(14):7004-14.
- 748 32. Carstea ED, Morris JA, Coleman KG, Loftus SK, Zhang D, Cummings C, et al.  
749 Niemann-Pick C1 disease gene: homology to mediators of cholesterol homeostasis.  
750 *Science.* 1997;277(5323):228-31.
- 751 33. Ioannou YA. The structure and function of the Niemann-Pick C1 protein.  
752 *Molecular genetics and metabolism.* 2000;71(1-2):175-81.
- 753 34. Kwon HJ, Abi-Mosleh L, Wang ML, Deisenhofer J, Goldstein JL, Brown MS, et  
754 al. Structure of N-terminal domain of NPC1 reveals distinct subdomains for binding and  
755 transfer of cholesterol. *Cell.* 2009;137(7):1213-24.
- 756 35. Konopka-Anstadt JL, Mainou BA, Sutherland DM, Sekine Y, Strittmatter SM,  
757 Dermody TS. The Nogo receptor NgR1 mediates infection by mammalian reovirus. *Cell*  
758 *Host Microbe.* 2014;15(6):681-91.
- 759 36. Barton ES, Connolly JL, Forrest JC, Chappell JD, Dermody TS. Utilization of  
760 sialic acid as a coreceptor enhances reovirus attachment by multistep adhesion  
761 strengthening. *J Biol Chem.* 2001;276(3):2200-11.
- 762 37. Urbanek K, Sutherland DM, Orchard RC, Wilen CB, Knowlton JJ, Aravamudhan  
763 P, et al. Cytidine monophosphate N-acetylneuraminic acid synthetase and solute carrier  
764 family 35 member A1 are required for reovirus binding and infection. *J Virol.* 2020;95(2).
- 765 38. Gentsch JR, Pacitti AF. Effect of neuraminidase treatment of cells and effect of  
766 soluble glycoproteins on type 3 reovirus attachment to murine L cells. *J Virol.*  
767 1985;56(2):356-64.
- 768 39. Avula K, Singh B, Kumar PV, Syed GH. Role of Lipid Transfer Proteins (LTPs) in  
769 the Viral Life Cycle. *Frontiers in microbiology.* 2021;12:673509.
- 770 40. Lai CM, Mainou BA, Kim KS, Dermody TS. Directional release of reovirus from  
771 the apical surface of polarized endothelial cells. *mBio.* 2013;4(2):e00049-13.
- 772 41. Fu J, Li L, Huo D, Zhi S, Yang R, Yang B, et al. Astrocyte-Derived TGF $\beta$ 1  
773 Facilitates Blood-Brain Barrier Function via Non-Canonical Hedgehog Signaling in Brain  
774 Microvascular Endothelial Cells. *Brain Sci.* 2021;11(1).
- 775 42. Borsa J, Copps TP, Sargent MD, Long DG, Chapman JD. New intermediate  
776 subviral particles in the in vitro uncoating of reovirus virions by chymotrypsin. *J Virol.*  
777 1973;11(4):552-64.
- 778 43. Parker JS, Broering TJ, Kim J, Higgins DE, Nibert ML. Reovirus core protein m2  
779 determines the filamentous morphology of viral inclusion bodies by interacting with and  
780 stabilizing microtubules. *J Virol.* 2002;76(9):4483-96.
- 781 44. Aravamudhan P, Raghunathan K, Konopka-Anstadt J, Pathak A, Sutherland DM,  
782 Carter BD, et al. Reovirus uses macropinocytosis-mediated entry and fast axonal  
783 transport to infect neurons. *PLoS Pathog.* 2020;16(2):e1008380.

- 784 45. Elrick MJ, Yu T, Chung C, Lieberman AP. Impaired proteolysis underlies  
785 autophagic dysfunction in Niemann-Pick type C disease. *Human molecular genetics*.  
786 2012;21(22):4876-87.
- 787 46. Carette JE, Raaben M, Wong AC, Herbert AS, Obernosterer G, Mulherkar N, et  
788 al. Ebola virus entry requires the cholesterol transporter Niemann-Pick C1. *Nature*.  
789 2011;477(7364):340-3.
- 790 47. Miller EH, Obernosterer G, Raaben M, Herbert AS, Deffieu MS, Krishnan A, et al.  
791 Ebola virus entry requires the host-programmed recognition of an intracellular receptor.  
792 *EMBO J*. 2012;31(8):1947-60.
- 793 48. Rosenbaum AI, Zhang G, Warren JD, Maxfield FR. Endocytosis of beta-  
794 cyclodextrins is responsible for cholesterol reduction in Niemann-Pick type C mutant  
795 cells. *Proc Natl Acad Sci U S A*. 2010;107(12):5477-82.
- 796 49. Peake KB, Vance JE. Normalization of cholesterol homeostasis by 2-  
797 hydroxypropyl- $\beta$ -cyclodextrin in neurons and glia from Niemann-Pick C1 (NPC1)-  
798 deficient mice. *J Biol Chem*. 2012;287(12):9290-8.
- 799 50. Liu B, Turley SD, Burns DK, Miller AM, Repa JJ, Dietschy JM. Reversal of  
800 defective lysosomal transport in NPC disease ameliorates liver dysfunction and  
801 neurodegeneration in the npc1<sup>-/-</sup> mouse. *Proc Natl Acad Sci U S A*. 2009;106(7):2377-  
802 82.
- 803 51. Ory DS, Ottinger EA, Farhat NY, King KA, Jiang X, Weissfeld L, et al. Intrathecal  
804 2-hydroxypropyl- $\beta$ -cyclodextrin decreases neurological disease progression in  
805 Niemann-Pick disease, type C1: a non-randomised, open-label, phase 1-2 trial. *Lancet*.  
806 2017;390(10104):1758-68.
- 807 52. Poh MK, Shui G, Xie X, Shi PY, Wenk MR, Gu F. U18666A, an intra-cellular  
808 cholesterol transport inhibitor, inhibits dengue virus entry and replication. *Antiviral*  
809 *research*. 2012;93(1):191-8.
- 810 53. Cuesta-Geijo M, Chiappi M, Galindo I, Barrado-Gil L, Muñoz-Moreno R,  
811 Carrascosa JL, et al. Cholesterol Flux Is Required for Endosomal Progression of  
812 African Swine Fever Virions during the Initial Establishment of Infection. *J Virol*.  
813 2016;90(3):1534-43.
- 814 54. Elgner F, Ren H, Medvedev R, Ploen D, Himmelsbach K, Boller K, et al. The  
815 Intracellular Cholesterol Transport Inhibitor U18666A Inhibits the Exosome-Dependent  
816 Release of Mature Hepatitis C Virus. *J Virol*. 2016;90(24):11181-96.
- 817 55. Yin X, Ambardekar C, Lu Y, Feng Z. Distinct Entry Mechanisms for  
818 Nonenveloped and Quasi-Enveloped Hepatitis E Viruses. *J Virol*. 2016;90(8):4232-42.
- 819 56. Rivera-Serrano EE, González-López O, Das A, Lemon SM. Cellular entry and  
820 uncoating of naked and quasi-enveloped human hepatoviruses. *eLife*. 2019;8.
- 821 57. Sobo K, Le Blanc I, Luyet PP, Fivaz M, Ferguson C, Parton RG, et al. Late  
822 endosomal cholesterol accumulation leads to impaired intra-endosomal trafficking. *PloS*  
823 *one*. 2007;2(9):e851.
- 824 58. Vanier MT. Niemann-Pick disease type C. *Orphanet J Rare Dis*. 2010;5:16.

- 825 59. Koller D, Lohner K. The role of spontaneous lipid curvature in the interaction of  
826 interfacially active peptides with membranes. *Biochimica et biophysica acta*.  
827 2014;1838(9):2250-9.
- 828 60. Maier O, Galan DL, Wodrich H, Wiethoff CM. An N-terminal domain of  
829 adenovirus protein VI fragments membranes by inducing positive membrane curvature.  
830 *Virology*. 2010;402(1):11-9.
- 831 61. Guo X, Steinkühler J, Marin M, Li X, Lu W, Dimova R, et al. Interferon-Induced  
832 Transmembrane Protein 3 Blocks Fusion of Diverse Enveloped Viruses by Altering  
833 Mechanical Properties of Cell Membranes. *ACS Nano*. 2021;15(5):8155-70.
- 834 62. Anafu AA, Bowen CH, Chin CR, Brass AL, Holm GH. Interferon-inducible  
835 transmembrane protein 3 (IFITM3) restricts reovirus cell entry. *J Biol Chem*.  
836 2013;288(24):17261-71.
- 837 63. Moyer CL, Wiethoff CM, Maier O, Smith JG, Nemerow GR. Functional genetic  
838 and biophysical analyses of membrane disruption by human adenovirus. *J Virol*.  
839 2011;85(6):2631-41.
- 840 64. Patel A, Mohl BP, Roy P. Entry of Bluetongue Virus Capsid Requires the Late  
841 Endosome-specific Lipid Lysobisphosphatidic Acid. *J Biol Chem*. 2016;291(23):12408-  
842 19.
- 843 65. Silva-Ayala D, López T, Gutiérrez M, Perrimon N, López S, Arias CF. Genome-  
844 wide RNAi screen reveals a role for the ESCRT complex in rotavirus cell entry. *Proc*  
845 *Natl Acad Sci U S A*. 2013;110(25):10270-5.
- 846 66. Snyder A, Abad A, Danthi, P. A CRISPR-Cas9 screen reveals a role for WD  
847 repeat-containing protein (WDR81) in the entry of late penetrating viruses.  
848 2021 <https://biorxiv.org/cgi/content/short/2021.09.26.461887v1>
- 849 67. Liu K, Jian Y, Sun X, Yang C, Gao Z, Zhang Z, et al. Negative regulation of  
850 phosphatidylinositol 3-phosphate levels in early-to-late endosome conversion. *J Cell*  
851 *Biol*. 2016;212(2):181-98.
- 852 68. Wheeler S, Schmid R, Sillence DJ. Lipid-Protein Interactions in Niemann-Pick  
853 Type C Disease: Insights from Molecular Modeling. *Int J Mol Sci*. 2019;20(3).
- 854 69. Rentero C, Blanco-Munoz P, Meneses-Salas E, Grewal T, Enrich C. Annexins-  
855 coordinators of cholesterol homeostasis in endocytic pathways. *Int J Mol Sci*.  
856 2018;19(5):E1444.
- 857 70. de Diego I, Schwartz F, Siegfried H, Dauterstedt P, Heeren J, Beisiegel U, et al.  
858 Cholesterol modulates the membrane binding and intracellular distribution of annexin 6.  
859 *J Biol Chem*. 2002;277(35):32187-94.
- 860 71. Mayran N, Parton RG, Gruenberg J. Annexin II regulates multivesicular  
861 endosome biogenesis in the degradation pathway of animal cells. *EMBO J*.  
862 2003;22(13):3242-53.
- 863 72. Hirsch AJ. The use of RNAi-based screens to identify host proteins involved in  
864 viral replication. *Future Microbiol*. 2010;5(2):303-11.

- 865 73. Puschnik AS, Majzoub K, Ooi YS, Carette JE. A CRISPR toolbox to study virus-  
866 host interactions. *Nat Rev Microbiol.* 2017;15(6):351-64.
- 867 74. Furlong DB, Nibert ML, Fields BN. Sigma 1 protein of mammalian reoviruses  
868 extends from the surfaces of viral particles. *J Virol.* 1988;62(1):246-56.
- 869 75. Virgin HW, Bassel-Duby R, Fields BN, Tyler KL. Antibody protects against lethal  
870 infection with the neurally spreading reovirus type 3 (Dearing). *J Virol.*  
871 1988;62(12):4594-604.
- 872 76. Smith RE, Zweerink HJ, Joklik WK. Polypeptide components of virions, top  
873 component and cores of reovirus type 3. *Virology.* 1969;39(4):791-810.
- 874 77. Fecek RJ, Busch R, Lin H, Pal K, Cunningham CA, Cuff CF. Production of Alexa  
875 Fluor 488-labeled reovirus and characterization of target cell binding, competence, and  
876 immunogenicity of labeled virions. *Journal of immunological methods.* 2006;314(1-  
877 2):30-7.
- 878 78. Wetzel JD, Chappell JD, Fogo AB, Dermody TS. Efficiency of viral entry  
879 determines the capacity of murine erythroleukemia cells to support persistent infections  
880 by mammalian reoviruses. *J Virol.* 1997;71(1):299-306.
- 881 79. Chandran K, Walker SB, Chen Y, Contreras CM, Schiff LA, Baker TS, et al. In  
882 vitro recoating of reovirus cores with baculovirus-expressed outer-capsid proteins m1  
883 and s3. *J Virol.* 1999;73(5):3941-50.
- 884 80. Orchard RC, Wilen CB, Doench JG, Baldrige MT, McCune BT, Lee YC, et al.  
885 Discovery of a proteinaceous cellular receptor for a norovirus. *Science.*  
886 2016;353(6302):933-6.
- 887 81. Doench JG, Fusi N, Sullender M, Hegde M, Vaimberg EW, Donovan KF, et al.  
888 Optimized sgRNA design to maximize activity and minimize off-target effects of  
889 CRISPR-Cas9. *Nat Biotechnol.* 2016;34(2):184-91.
- 890 82. Spence JS, Krause TB, Mittler E, Jangra RK, Chandran K. Direct visualization of  
891 ebola virus fusion triggering in the endocytic pathway. *mBio.* 2016;7(1):e01857-15.
- 892 83. Dehairs J, Talebi A, Cherifi Y, Swinnen JV. CRISP-ID: decoding CRISPR  
893 mediated indels by Sanger sequencing. *Sci Rep.* 2016;6:28973.
- 894 84. Olivio-Marin JC. Extraction of spots in biological images using multi-scale  
895 products. *Pattern Recognition.* 2002;35(9):1989-96.

896

897 **FIGURE LEGENDS**

898

899 **FIG 1** CRISPR and siRNA screens identify NPC1 as a cellular factor required for  
900 reovirus infection. (A) The top 20 candidates from the CRISPR screen using reovirus  
901 strains T1L and T3D are ranked by their STAR scores. Heat map indicates STAR  
902 values. (B) Genes from the siRNA screen using reovirus strain T3SA+ common to the  
903 CRISPR screen using T1L and T3D, excluding ribosomal genes. Heat map indicates z-  
904 score values. (C) Venn diagram of genes from the CRISPR screens using T1L and T3D  
905 and the siRNA screen using T3SA+. (D) Molecular function pathways using Gene  
906 Ontology to analyze genes from the CRISPR screen common to T1L and T3D. (E)  
907 KEGG pathways identified for the CRISPR screen using T1L (red) and T3D (blue) and  
908 siRNA screen using T3SA+ (light blue).

909

910 **FIG 2** Viral infectivity and titers following adsorption by reovirus virions and ISVPs. (A,  
911 B) WT, KO, and KO+ HBMECs were adsorbed with reovirus (A) virions or (B) ISVPs at  
912 MOIs of 10,000 or 100 particles/cell, respectively, and fixed at 18 h post-adsorption.  
913 The percentage of infected cells was determined by enumerating reovirus-infected cells  
914 following immunostaining with a reovirus-specific antiserum. (C-F) WT, KO, and KO+  
915 cells were adsorbed with reovirus (C, E) virions at an MOI of 1 PFU/cell or (D, F) ISVPs  
916 at an MOI of 5 particles/cell. Viral titers in cell-culture supernatants and lysates were  
917 determined by plaque assay at 0, 24, and 48 h post-adsorption. The results are  
918 presented as the mean of three independent experiments. Error bars indicated standard  
919 deviation. \*,  $P < 0.05$ ; \*\*,  $P < 0.01$ ; \*\*\*,  $P < 0.001$ ; \*\*\*\*,  $P < 0.0001$ , as determined by t-  
920 test.

921

922 **FIG 3** Binding, internalization, and uncoating are not disrupted by cholesterol  
923 accumulation in NPC1 KO HBMECs. (A) WT, KO, and KO+ HBMECs were adsorbed  
924 with Alexa 647 labeled-reovirus virions at an MOI of 10,000 particles/cell at 4°C for 1 h,  
925 fixed with 1% PFA, and analyzed for virus binding using flow cytometry. The results are  
926 presented as mean virus binding as determined by mean fluorescence intensity (MFI) of  
927 three independent experiments. Error bars indicated standard deviation. (B) WT, KO,  
928 and KO+ HBMECs were adsorbed with Alexa 647 labeled-reovirus virions at an MOI of  
929 10,000 particles/cell at 4°C for 45 min and imaged using high magnification live-cell  
930 imaging, with images captured every ~ 25 seconds. Representative micrographs from  
931 videos at the indicated intervals are shown. Scale bars, 10  $\mu$ m. (C) WT, KO, and KO+  
932 HBMECs were adsorbed with reovirus virions at an MOI of 10,000 particles/cell at 4°C  
933 for 1 h and lysed at the intervals post-adsorption shown. Cell lysates were subjected to  
934 electrophoresis and immunoblotting using a reovirus-specific polyclonal rabbit  
935 antiserum. The results are presented as the mean ratio of the  $\delta$  and  $\mu$ 1C bands from  
936 three independent experiments. Error bars indicate standard deviation. Differences are  
937 not significant, as determined by two-tailed unpaired t-test.

938

939 **FIG 4** Cytosolic entry of reovirus cores. (A) WT, KO, and KO+ HBMECs were adsorbed  
940 with Alexa 647 labeled-reovirus virions at an MOI of 10,000 particles/cell at 37°C for 45  
941 min and fixed with 4% PFA at 8 h post-adsorption. Cells were stained with DAPI, a CD-  
942 63-specific antibody to label endosomes, and an antiserum specific for reovirus cores,  
943 and imaged using confocal microscopy. Representative confocal micrographs are  
944 shown. (B) Colocalization of reovirus, cores, and endosomes was analyzed using the  
945 JaCoP plugin function from ImageJ. The results are presented as the mean  
946 colocalization (quantified by Manders coefficient) of ~ 50 cells from three independent

947 experiments. Error bars indicate standard deviation. \*\*,  $P < 0.01$ ; \*\*\*,  $P < 0.001$ , as  
948 determined by two-tailed unpaired t-test.

949

950 **FIG 5** Synthesis of nascent RNA is reduced in NPC1 KO HBMECs. WT, KO, and KO+  
951 HBMECs were adsorbed with reovirus virions at an MOI of 1 PFU/cell at 37°C for 1 h,  
952 lysed at the intervals post-adsorption shown, and assayed for positive-sense reovirus  
953 s4 RNA by RT-qPCR. The results are presented as the mean number of copies of  
954 reovirus s4 RNA by qPCR from two independent experiments. Error bars indicate  
955 standard errors of the mean. \*\*,  $P < 0.01$ ; \*\*\*,  $P < 0.001$ , as determined by t-test.

956

957 **FIG 6** H $\beta$ CD treatment restores reovirus infection of NPC1 KO HBMECs. WT, KO, and  
958 KO+ HBMECs were pretreated with 1 mM H $\beta$ CD or PBS for 24 h, adsorbed with  
959 reovirus virions or ISVPs at MOIs of 10,000 or 100 particles/cell, respectively, and fixed  
960 at 18 h post-adsorption. The percentage of infected cells was determined by  
961 enumerating reovirus-infected cells following immunostaining with a reovirus-specific  
962 antiserum. The results are presented as the mean of three independent experiments.  
963 Error bars indicated standard deviation. \*\*\*,  $P < 0.001$  as determined by two-tailed  
964 unpaired t-test.

965

## 966 **SUPPLEMENTAL MATERIALS**

### 967 **FIGURES AND MOVIES**

968

969 **FIG S1** Effect on cholesterol distribution by disruption of NPC1 expression. (A, B)  
970 Lysates of WT, KO, and KO+ HBMECs were subjected to electrophoresis and  
971 immunoblotting using an NPC1 antiserum. GAPDH was used as loading control. A

972 representative immunoblot is shown. The results are presented as the mean of two  
973 independent experiments. Error bars indicate standard deviation. Statistical analysis  
974 was done by two-tailed unpaired t-test. (C) WT, KO, and KO+ HBMECs were stained  
975 with filipin III to detect cholesterol distribution. Representative images are shown. Scale  
976 bars, 10  $\mu\text{m}$ . (D) WT, KO, and KO+ HBMECs were stained with filipin III and an anti-  
977 CD63 antibody to detect the subcellular localization of cholesterol. Representative  
978 images are shown. Scale bars, 10  $\mu\text{m}$ .

979 **FIG S2** Viral infectivity following adsorption by T1L, T3D, and T3SA+ virions. (A, B) WT,  
980 KO, and KO+ HBMECs were adsorbed with reovirus virions at MOIs of 10,000  
981 particles/cell, and fixed at 18 h post-adsorption. The percentage of infected cells was  
982 determined by enumerating reovirus-infected cells following immunostaining with a  
983 reovirus-specific antiserum. Error bars indicated standard deviation. \*\*,  $P < 0.01$ ; \*\*\*,  $P$   
984  $< 0.001$ , as determine by 2 way ANOVA, Tukey's multiple comparisons test.

985 **FIG S3** H $\beta$ CD treatment restores cholesterol efflux in KO cells. (A) WT, KO, and KO+  
986 HBMECs were treated with H $\beta$ CD at the concentrations shown for 48 h and assessed  
987 for viability using the Presto blue cell viability reagent. The results are presented as the  
988 mean cell viability of three independent experiments. Error bars indicated standard  
989 deviation. \*\*,  $P < 0.01$ ; \*\*\*,  $P < 0.001$ ; \*\*\*\*,  $P < 0.0001$ , as determined by two-way  
990 ANOVA. (B, C) Cells were treated with 1 mM H $\beta$ CD or PBS (mock) for 48 h, fixed with  
991 4% PFA, stained with filipin III, and imaged using confocal microscopy. (B) The results  
992 are presented as the mean filipin III staining (quantified by MFI) of  $\sim 50$  cells from three  
993 independent experiments. Error bars indicate the minimum and the maximum values. \*,  
994  $P < 0.05$ ; \*\*\*\*,  $P < 0.0001$ , as determined by two-tailed unpaired t-test. (C)  
995 Representative images of cholesterol distribution in H $\beta$ CD-treated and mock-treated  
996 cells are shown. Scale bars, 10  $\mu\text{m}$ .



997

998 **VIDEO 1, 2, and 3** High-magnification, live-cell microscopy of fluorescent reovirus virion  
999 transport in WT, KO, and KO+ HBMECs. (1) WT, (2) KO, and (3) KO+ cells were  
1000 adsorbed with Alexa 647-labeled reovirus virions at an MOI of 10,000 particles/cell at  
1001 4°C for 45 min. Fluorescence and brightfield images were captured every ~ 25 seconds  
1002 for 36 min.

1003

1004 **VIDEO 4, 5, and 6** Tracking of fluorescent reovirus virions recruited to a perinuclear  
1005 region following entry. Trajectories of reovirus virions during internalization into WT, KO,  
1006 and KO+ HBMECs from videos 1, 2, and 3 were tracked with the spot-tracking plugin  
1007 function of Icy-Bioimage analysis software (84). Cell contour was defined as a region of  
1008 interest (ROI), and ~ 7 pixels/spot were monitored. The colored bar represents the  
1009 trajectory depending on time, in which each color (from yellow to red) corresponds to an  
1010 interval of ~ 7.5 min in the time-lapse videos. Scale bars, 10  $\mu$ m.

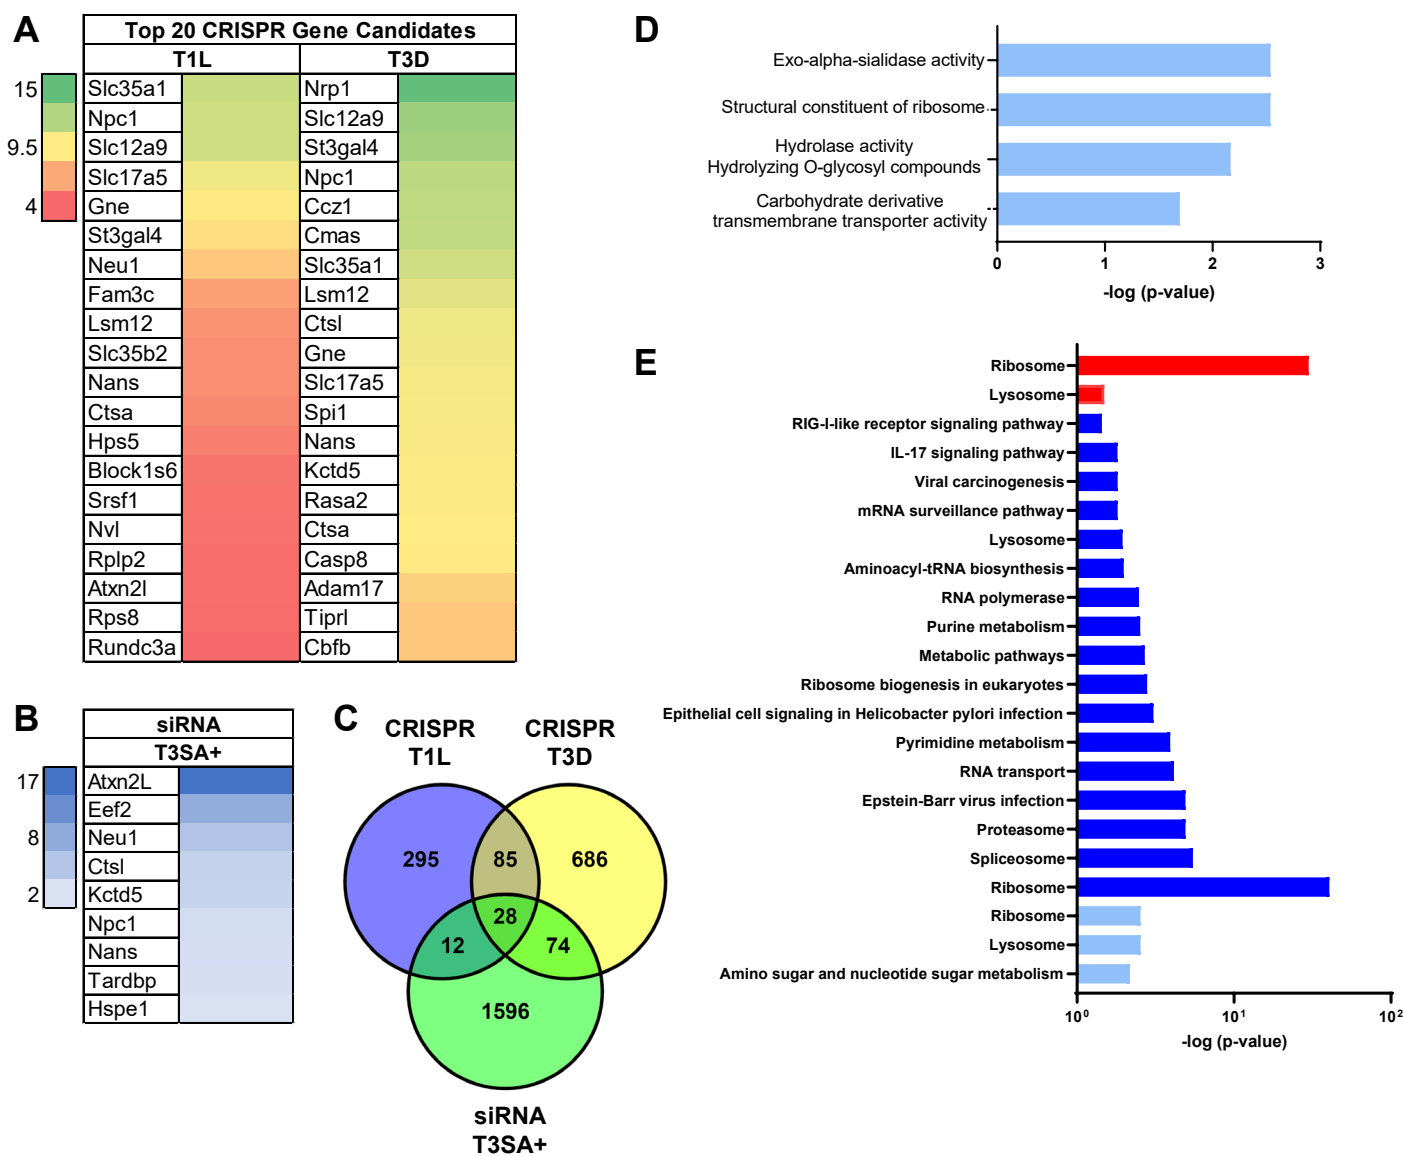

**FIG 1** CRISPR and siRNA screens identify NPC1 as a cellular factor required for reovirus infection. (A) The top 20 candidates from the CRISPR screen using reovirus strains T1L and T3D are ranked by their STAR scores. Heat map indicates STAR values. (B) Genes from the siRNA screen using reovirus strain T3SA+ common to the CRISPR screen using T1L and T3D, excluding ribosomal genes. Heat map indicates z-score values. (C) Venn diagram of genes from the CRISPR screens using T1L and T3D and the siRNA screen using T3SA+. (D) Molecular function pathways using Gene Ontology to analyze genes from the CRISPR screen common to T1L and T3D. (E) KEGG pathways identified for the CRISPR screen using T1L (red) and T3D (blue) and siRNA screen using T3SA+ (light blue).

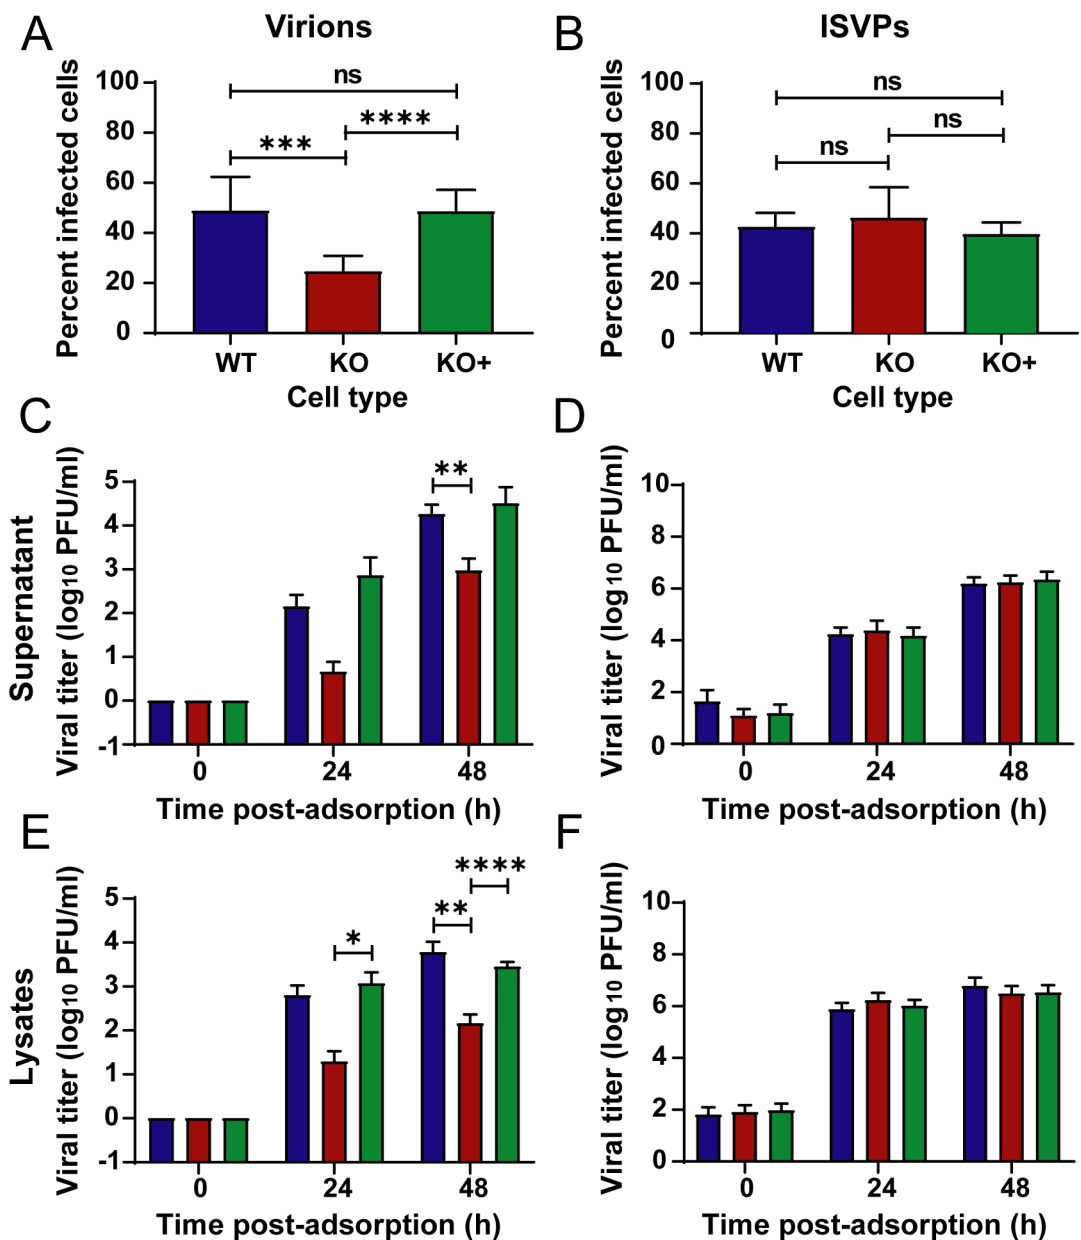

**FIG 2** Viral infectivity and titers following adsorption by reovirus virions and ISVPs. (A, B) WT, KO, and KO+ HBMECs were adsorbed with reovirus (A) virions or (B) ISVPs at MOIs of 10,000 or 100 particles/cell, respectively, and fixed at 18 h post-adsorption. The percentage of infected cells was determined by enumerating reovirus-infected cells following immunostaining with a reovirus-specific antiserum. (C-F) WT, KO, and KO+ cells were adsorbed with reovirus (C, E) virions at an MOI of 1 PFU/cell or (D, F) ISVPs at an MOI of 5 particles/cell. Viral titers in cell-culture supernatants and lysates were determined by plaque assay at 0, 24, and 48 h post-adsorption. The results are presented as the mean of three independent experiments. Error bars indicated standard deviation. \*,  $P < 0.05$ ; \*\*,  $P < 0.01$ ; \*\*\*,  $P < 0.001$ ; \*\*\*\*,  $P < 0.0001$ , as determined by t-test.

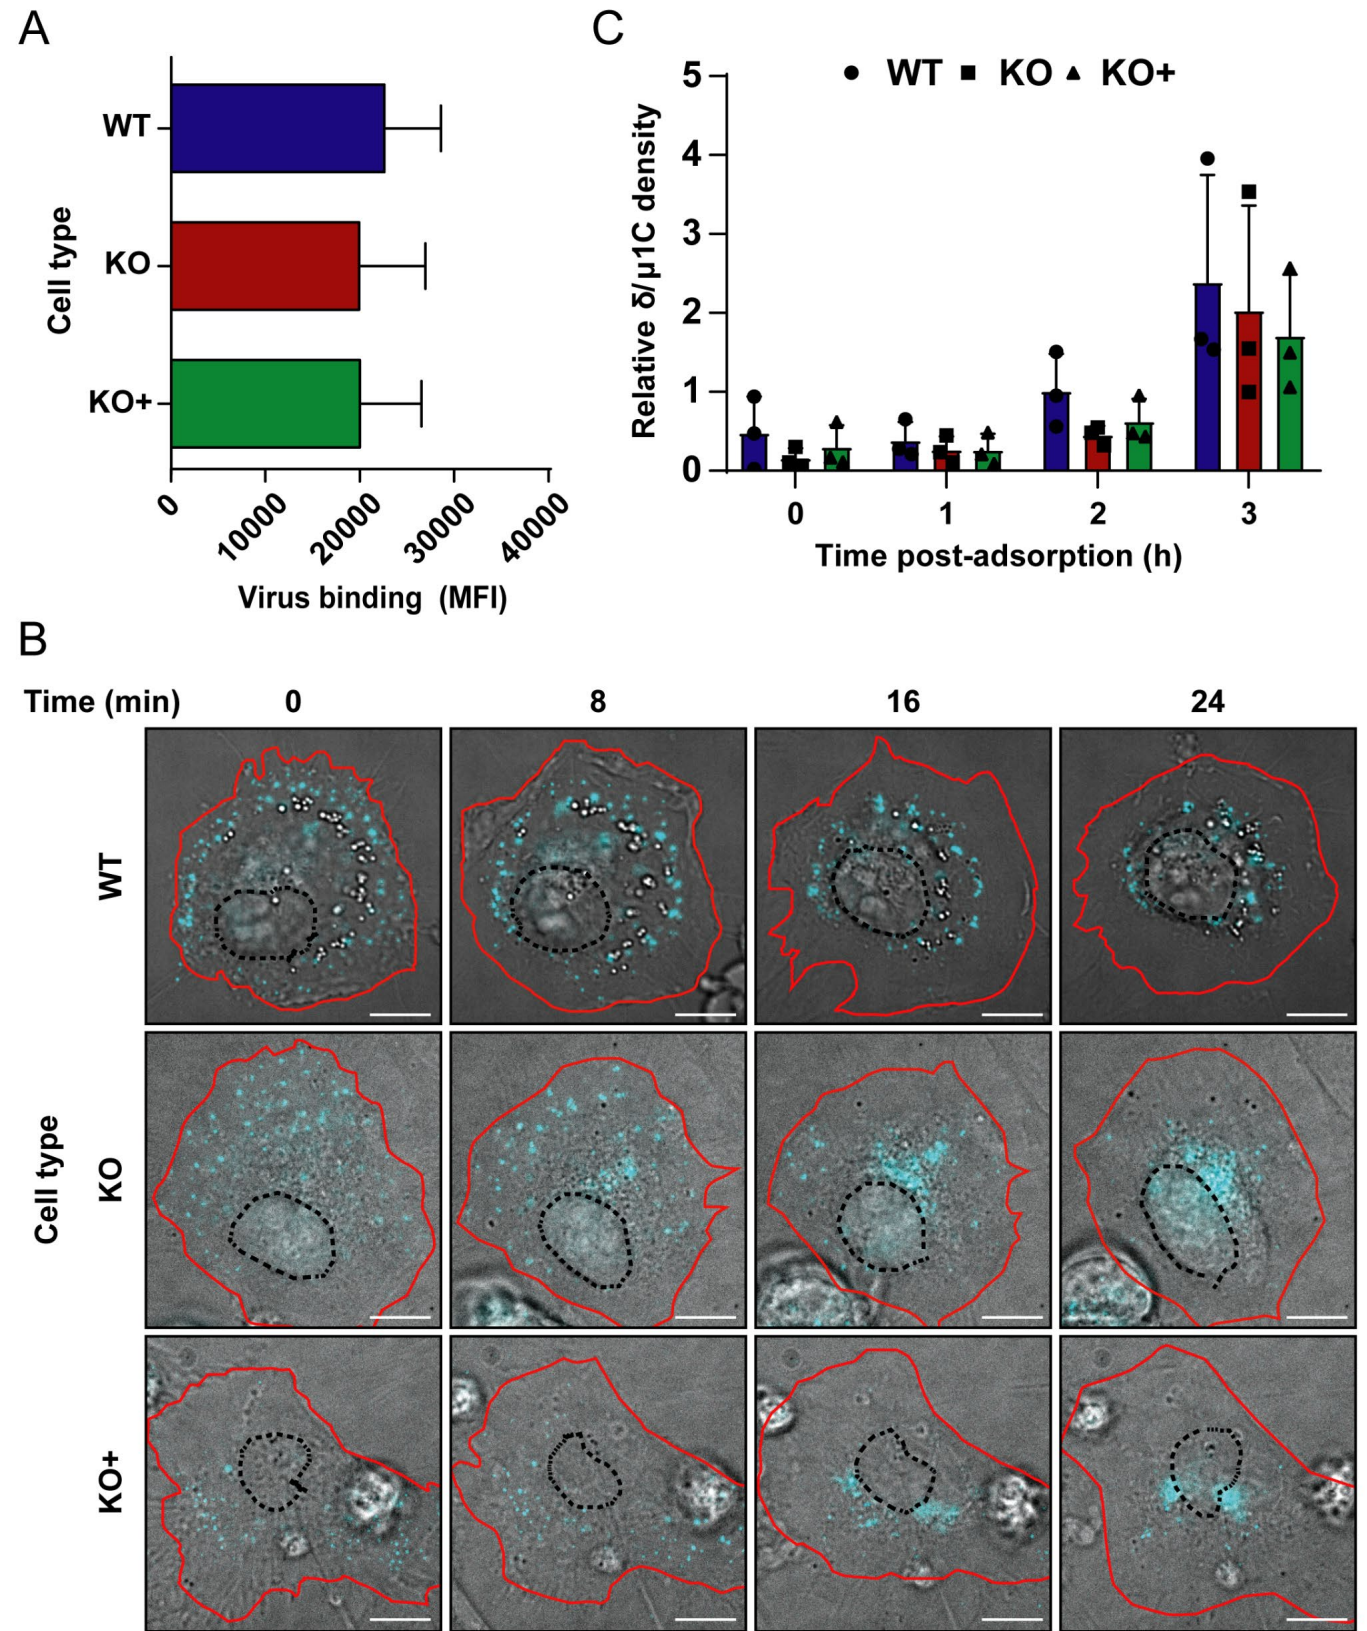

**FIG 3** Binding, internalization, and uncoating are not disrupted by cholesterol accumulation in NPC1 KO HBMECs. (A) WT, KO, and KO+ HBMECs were adsorbed with Alexa 647 labeled-reovirus virions at an MOI of 10,000 particles/cell at 4°C for 1 h, fixed with 1% PFA, and analyzed for virus binding using flow cytometry. The results are presented as mean virus binding as determined by mean fluorescence intensity (MFI) of three independent experiments. Error bars indicated standard deviation. (B) WT, KO, and KO+ HBMECs were adsorbed with Alexa 647 labeled-reovirus virions at an MOI of 10,000 particles/cell at 4°C for 45 min and imaged using high magnification live-cell imaging, with images captured every ~ 25 seconds. Representative micrographs from videos at the indicated intervals are shown. Scale bars, 10  $\mu$ m. (C) WT, KO, and KO+ HBMECs were adsorbed with reovirus virions at an MOI of 10,000 particles/cell at 4°C for 1 h and lysed at the intervals post-adsorption shown. Cell lysates were subjected to electrophoresis and immunoblotting using a reovirus-specific polyclonal rabbit antiserum. The results are presented as the mean ratio of the  $\delta$  and  $\mu 1C$  bands from three independent experiments. Error bars indicate standard deviation. Differences are not significant, as determined by two-tailed unpaired t-test.

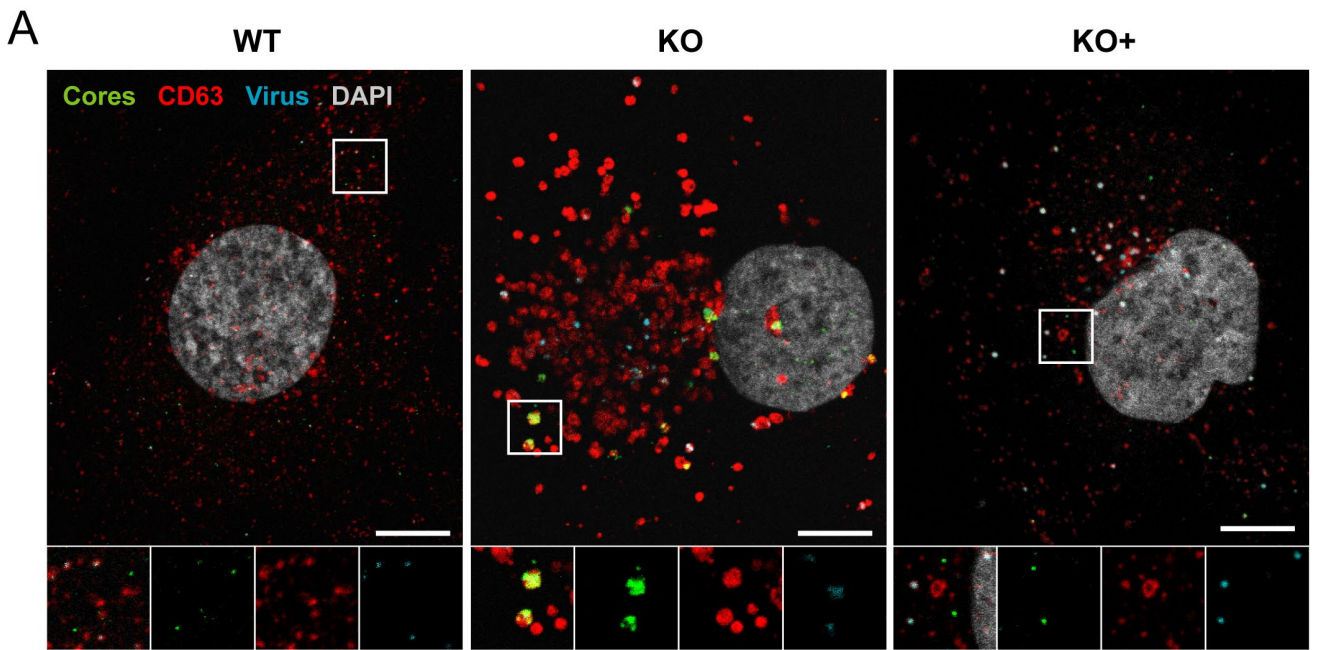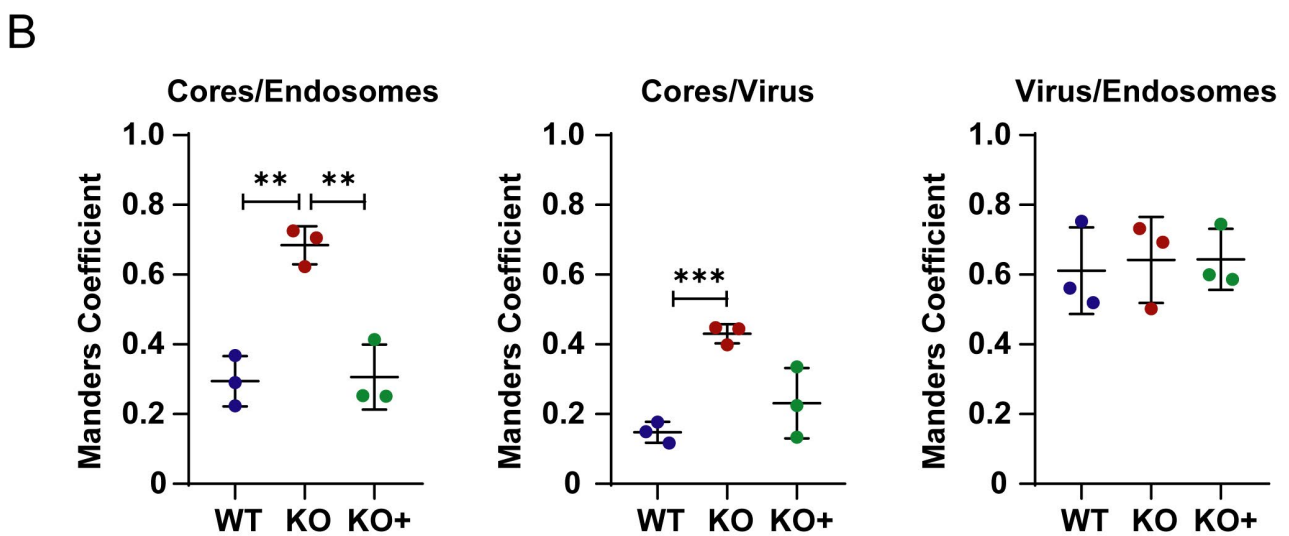

**FIG 4** Cytosolic entry of reovirus cores. (A) WT, KO, and KO+ HBMECs were adsorbed with Alexa 647 labeled-reovirus virions at an MOI of 10,000 particles/cell at 37°C for 45 min and fixed with 4% PFA at 8 h post-adsorption. Cells were stained with DAPI, a CD-63-specific antibody to label endosomes, and an antiserum specific for reovirus cores, and imaged using confocal microscopy. Representative confocal micrographs are shown. (B) Colocalization of reovirus, cores, and endosomes was analyzed using the JaCoP plugin function from ImageJ. The results are presented as the mean colocalization (quantified by Manders coefficient) of ~ 50 cells from three independent experiments. Error bars indicate standard deviation. \*\*,  $P < 0.01$ ; \*\*\*,  $P < 0.001$ , as determined by two-tailed unpaired t-test.

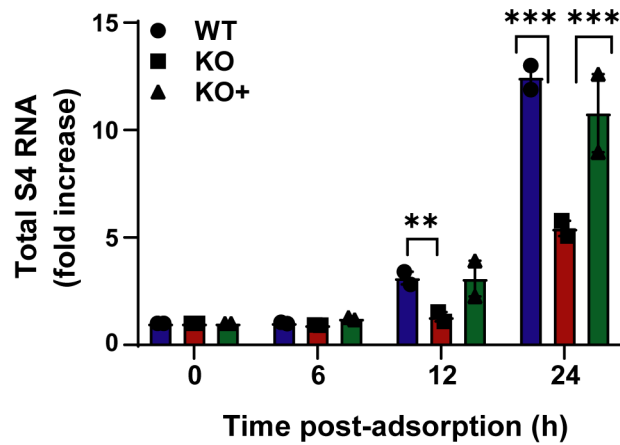

**FIG 5** Synthesis of nascent RNA is reduced in NPC1 KO HBMECs. WT, KO, and KO+ HBMECs were adsorbed with reovirus virions at an MOI of 1 PFU/cell at 37°C for 1 h, lysed at the intervals post-adsorption shown, and assayed for positive-sense reovirus s4 RNA by RT-qPCR. The results are presented as the mean number of copies of reovirus s4 RNA by qPCR from two independent experiments. Error bars indicate standard errors of the mean. \*\*,  $P < 0.01$ ; \*\*\*,  $P < 0.001$ , as determined by t-test.

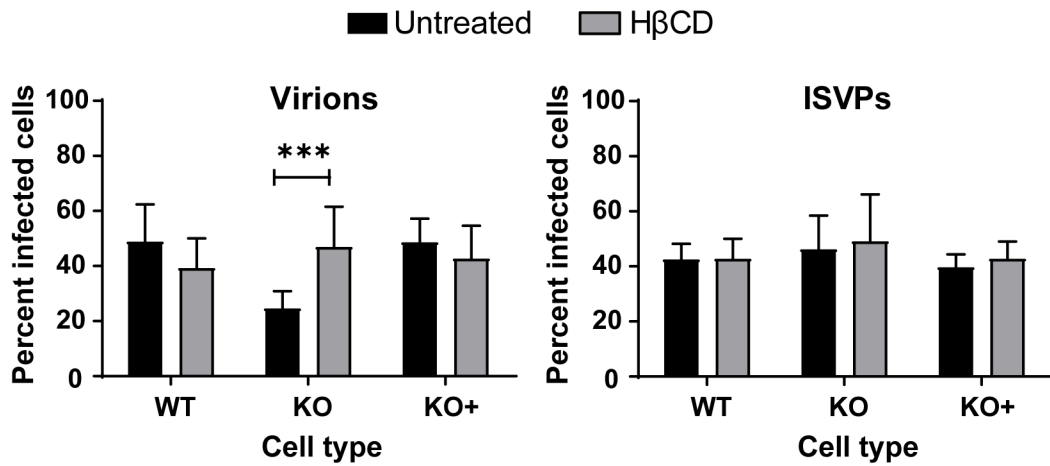

**FIG 6** H $\beta$ CD treatment restores reovirus infection of NPC1 KO HBMECs. WT, KO, and KO+ HBMECs were pretreated with 1 mM H $\beta$ CD or PBS for 24 h, adsorbed with reovirus virions or ISVPs at MOIs of 10,000 or 100 particles/cell, respectively, and fixed at 18 h post-adsorption. The percentage of infected cells was determined by enumerating reovirus-infected cells following immunostaining with a reovirus-specific antiserum. The results are presented as the mean of three independent experiments. Error bars indicated standard deviation. \*\*\*,  $P < 0.001$  as determined by two-tailed unpaired t-test.
